# Supplementary material for: Interlaboratory comparison program for nondestructive assay of prototype uranium reference materials
Source: MDPI journal article supplement (doi:10.3390/ijms231810799), 1986-12-01
Supplement: s1 [file s1]

# Zygo-Albuside A: New Saponin from *Zygophyllum album* L. with Significant Antioxidant, Anti-Inflammatory and Antiapoptotic Effects against Methotrexate-Induced Testicular Damage

## Table of Contents

|                                                                                                       |    |
|-------------------------------------------------------------------------------------------------------|----|
| Figure S1: <sup>1</sup> H-NMR spectrum of Compound 1 (500 MHz, CDCl <sub>3</sub> ).....               | 2  |
| Figure S2: <sup>13</sup> C-NMR spectrum of Compound 1 (125 MHz, CDCl <sub>3</sub> ).....              | 3  |
| Figure S3: <sup>1</sup> H-NMR spectrum of Compound 2 (500 MHz, CDCl <sub>3</sub> ).....               | 4  |
| Figure 4: <sup>13</sup> C-NMR spectrum of Compound 2 (125 MHz, CDCl <sub>3</sub> ). ....              | 5  |
| Figure S5: <sup>1</sup> H-NMR spectrum of Compound 3 (500 MHz, C <sub>5</sub> D <sub>5</sub> N). .... | 6  |
| Figure S6: <sup>13</sup> C-NMR spectrum of Compound 3 (125 MHz, C <sub>5</sub> D <sub>5</sub> N)..... | 7  |
| Figure S7: <sup>1</sup> H-NMR spectrum of Compound 4 (500 MHz, MeOH).....                             | 8  |
| Figure S8: <sup>13</sup> C-NMR spectrum of Compound 4 (125 MHz, MeOH).....                            | 9  |
| Figure S9: <sup>1</sup> H-NMR spectrum of Compound 5 (500 MHz, DMSO-d <sub>6</sub> ). ....            | 10 |
| Figure S10: <sup>13</sup> C-NMR spectrum of Compound 5 (125 MHz, DMSO-d <sub>6</sub> ).....           | 10 |
| Figure S11: <sup>1</sup> H-NMR spectrum of Compound 6 (500 MHz, DMSO-d <sub>6</sub> ). ....           | 11 |
| Figure S12: <sup>13</sup> C-NMR spectrum of Compound 6 (125 MHz, DMSO-d <sub>6</sub> ).....           | 11 |
| Figure S13: HRMS of Compound 7 .....                                                                  | 12 |
| Figure S14: <sup>1</sup> H-NMR spectrum of Compound 7 (500 MHz, MeOH).....                            | 13 |
| Figure S15: Partial expansion of <sup>1</sup> H-NMR spectrum of Compound 7 (500 MHz, MeOH). ....      | 14 |
| Figure S16: Partial expansion of <sup>1</sup> H-NMR spectrum of Compound 7 (500 MHz, MeOH). ....      | 15 |
| Figure S17: <sup>13</sup> C-NMR spectrum of Compound 7 (125 MHz, MeOH).....                           | 16 |
| Figure S18: Partial expansion of <sup>13</sup> C-NMR spectrum of Compound 7 (125 MHz, MeOH).....      | 17 |
| Figure S19: Partial expansion of <sup>13</sup> C-NMR spectrum of Compound 7 (125 MHz, MeOH).....      | 18 |
| Figure S20: Partial expansion of <sup>13</sup> C-NMR spectrum of Compound 7 (125 MHz, MeOH).....      | 19 |
| Figure S21: Partial expansion of <sup>13</sup> C-NMR spectrum of Compound 7 (125 MHz, MeOH).....      | 20 |
| Figure S22: DEPT 135 of Compound 7 (125 MHz, MeOH).....                                               | 21 |
| Figure S23: COSY of Compound 7.....                                                                   | 22 |
| Figure S24: Partial expansion of COSY of Compound 7. ....                                             | 22 |
| Figure S25: HMBC of compound 7 .....                                                                  | 23 |
| Figure S26: Expansion of HMBC of compound 7. ....                                                     | 24 |
| Figure S27: HSQC of compound 7 .....                                                                  | 25 |
| Figure S28: Expansion of HSQC of compound 7. ....                                                     | 26 |
| Figure S29: Expansion of HSQC of compound 7. ....                                                     | 27 |
| Figure S30: <sup>1</sup> H-NMR spectrum of Compound 8 (500 MHz, DMSO-d <sub>6</sub> ). ....           | 28 |
| Figure 31: <sup>13</sup> C-NMR spectrum of Compound 8 (125 MHz, DMSO-d <sub>6</sub> ). ....           | 29 |
| Table S1: Liver enzymes and kidney markers in the groups of the preliminary study.....                | 29 |

**amplification.....30**

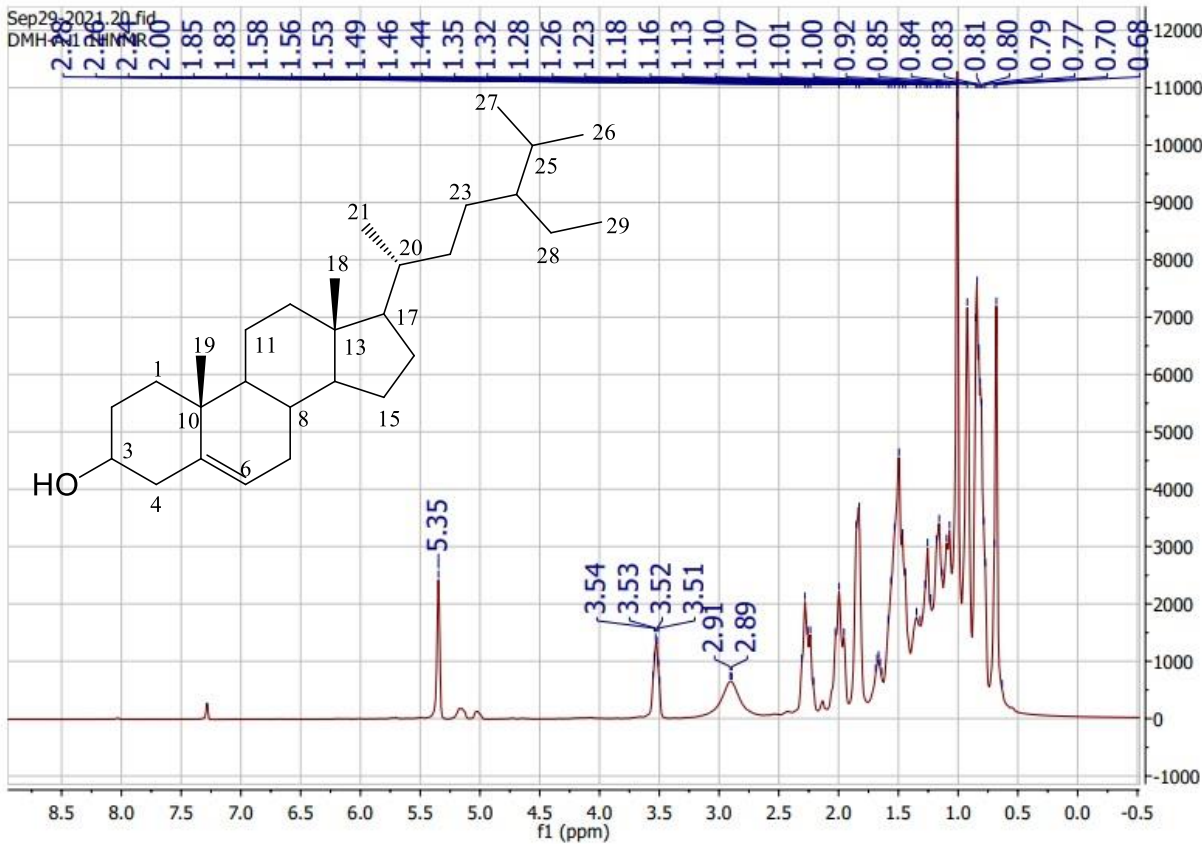

**Figure S1:  $^1\text{H}$ -NMR spectrum of Compound 1 (500 MHz,  $\text{CDCl}_3$ ).**

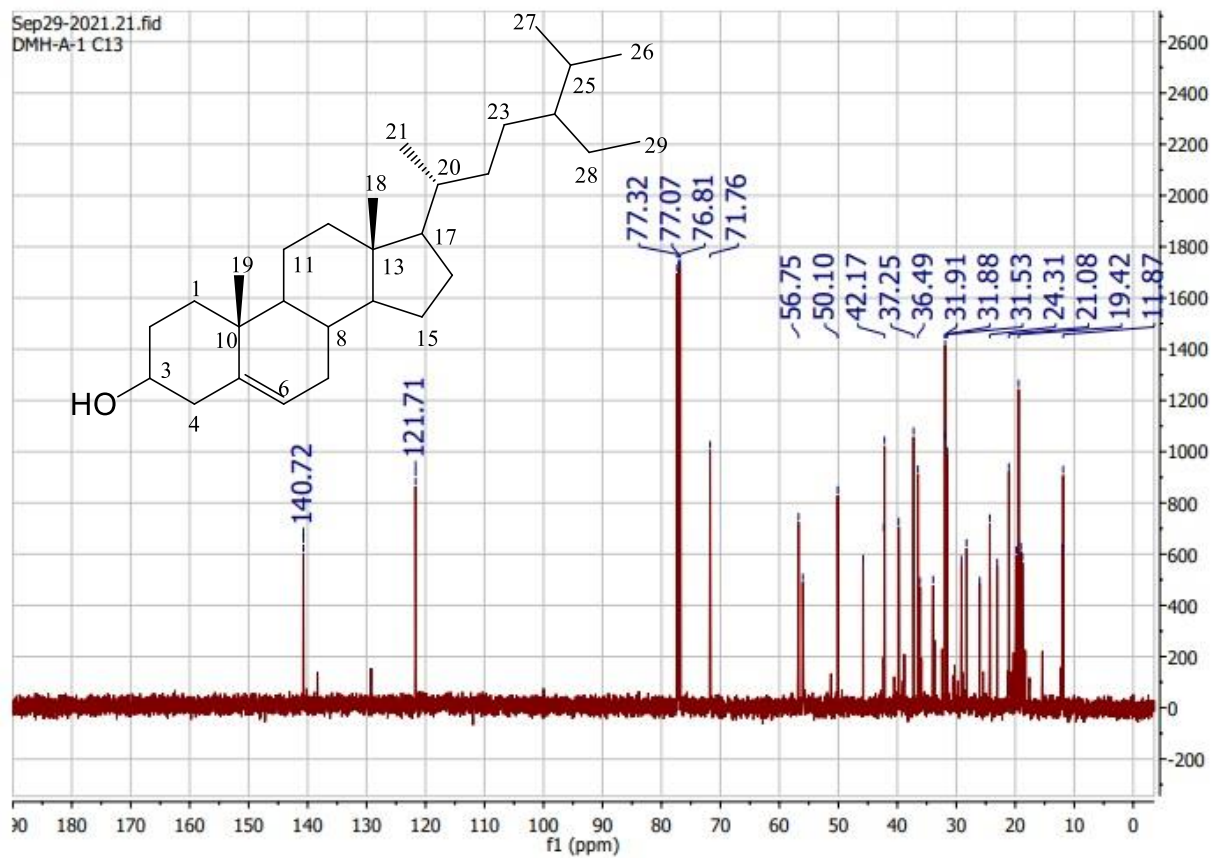

Figure S2:  $^{13}\text{C}$ -NMR spectrum of Compound 1 (125 MHz,  $\text{CDCl}_3$ ).

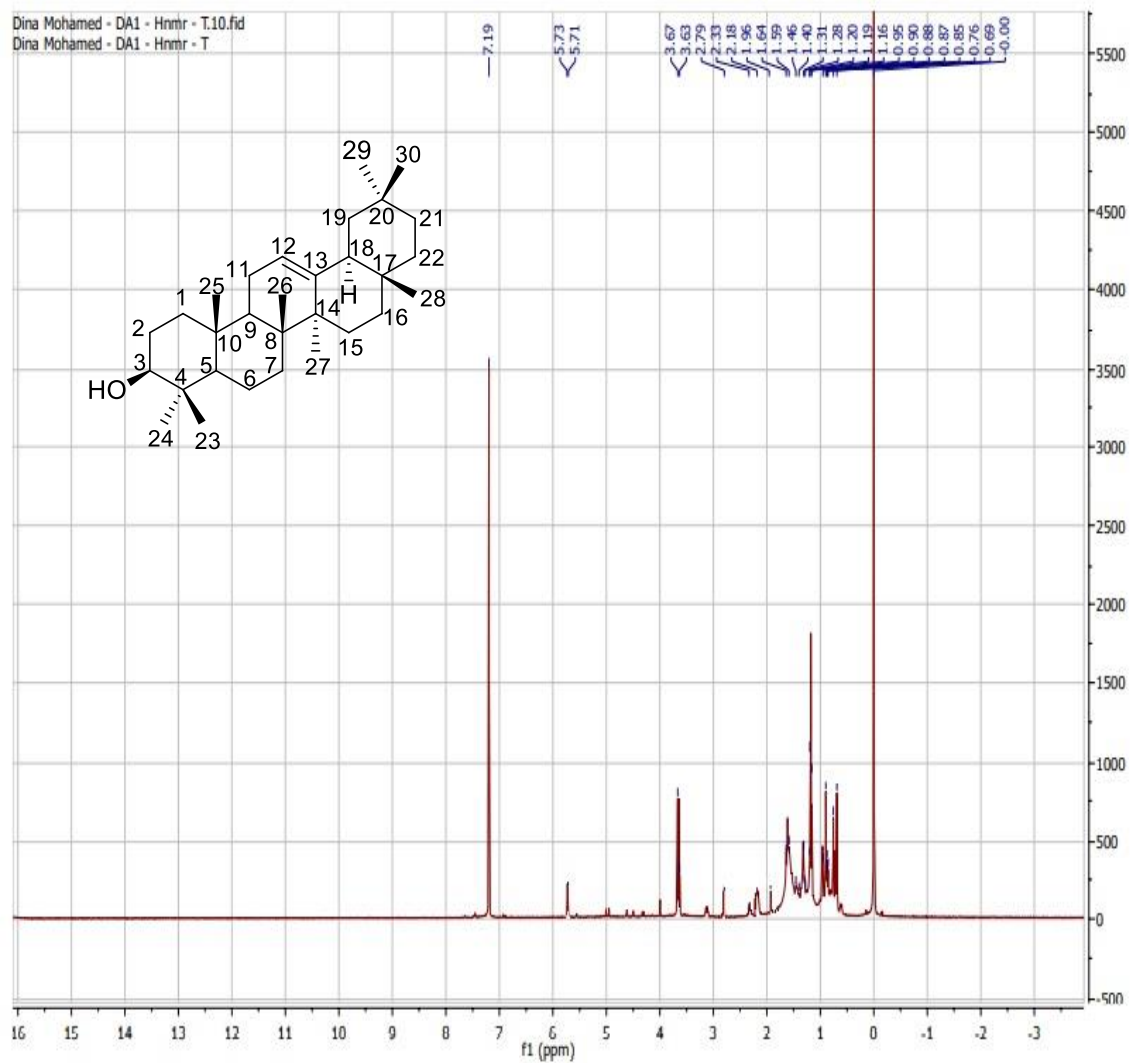

**Figure S3:  $^1\text{H-NMR}$  spectrum of Compound 2 (500 MHz,  $\text{CDCl}_3$ ).**

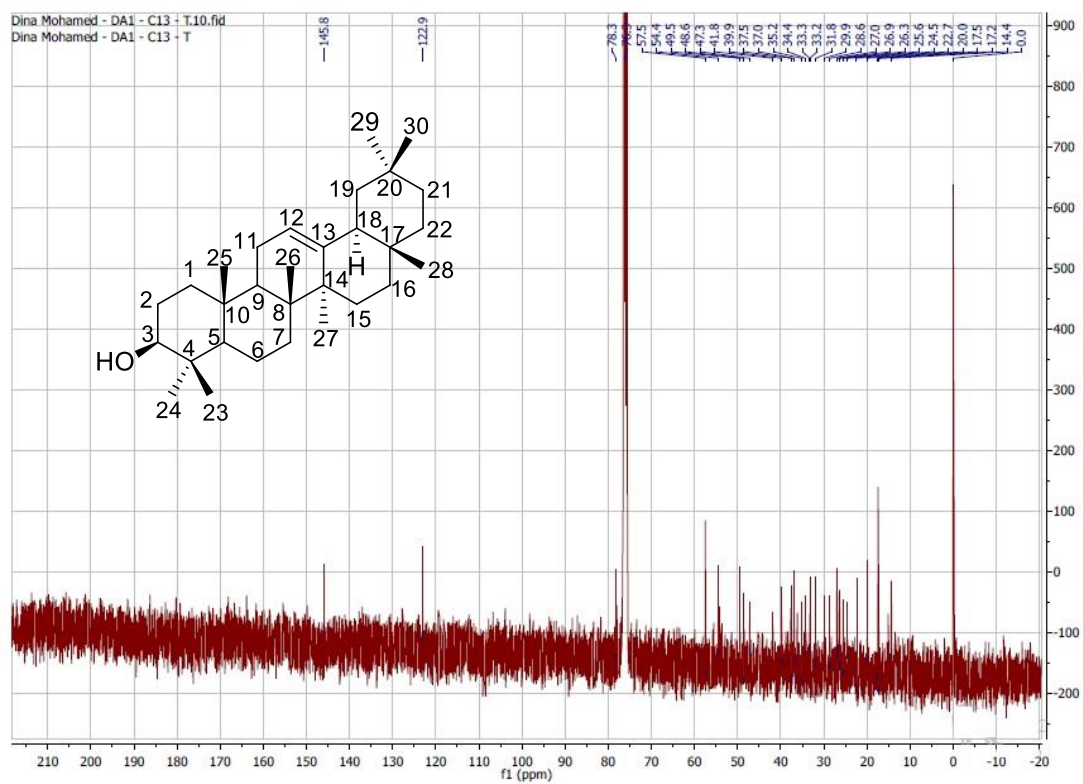

Figure 4: <sup>13</sup>C-NMR spectrum of Compound 2 (125 MHz, CDCl<sub>3</sub>).

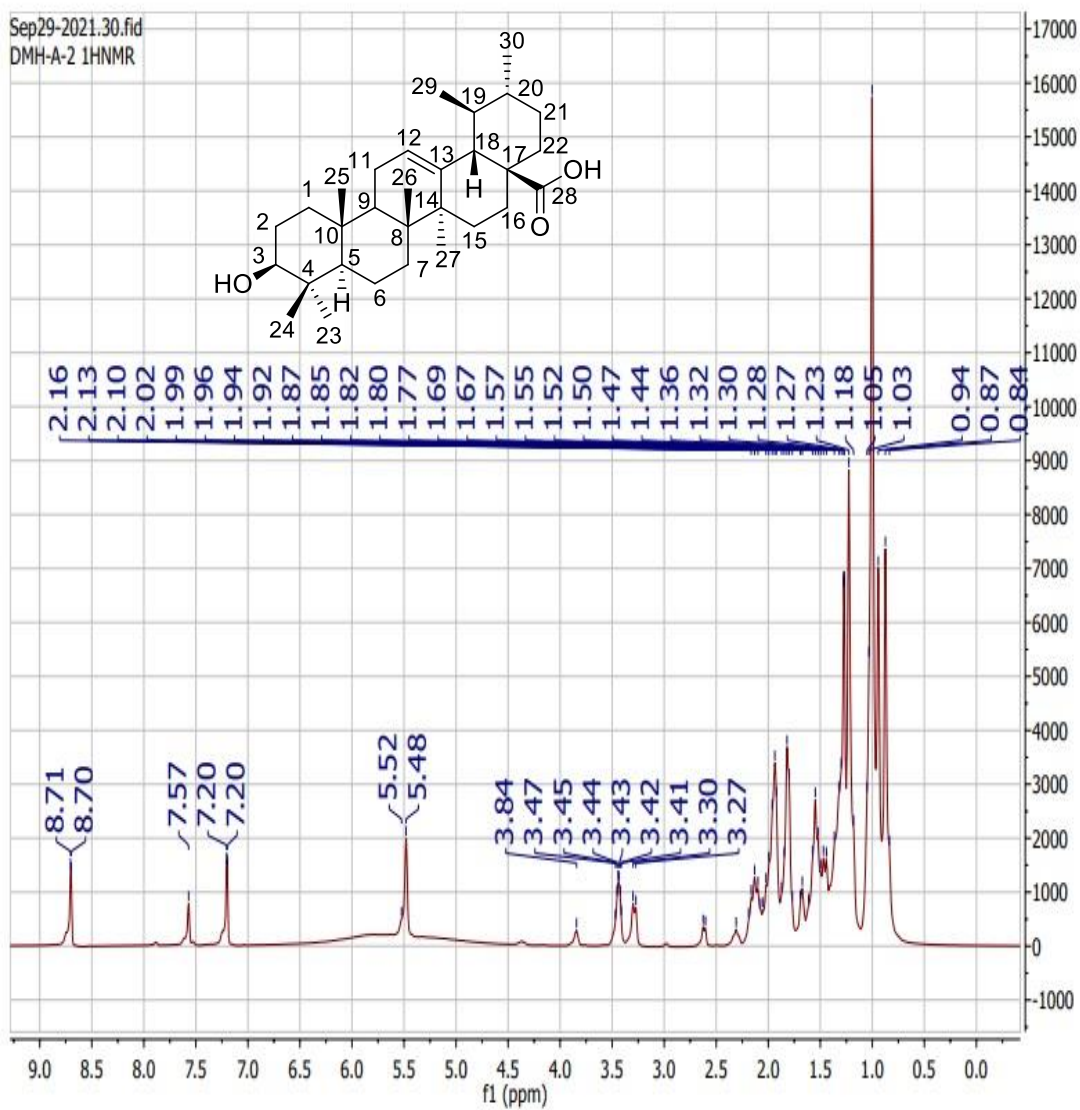

Figure S5: <sup>1</sup>H-NMR spectrum of Compound 3 (500 MHz, C<sub>5</sub>D<sub>5</sub>N).

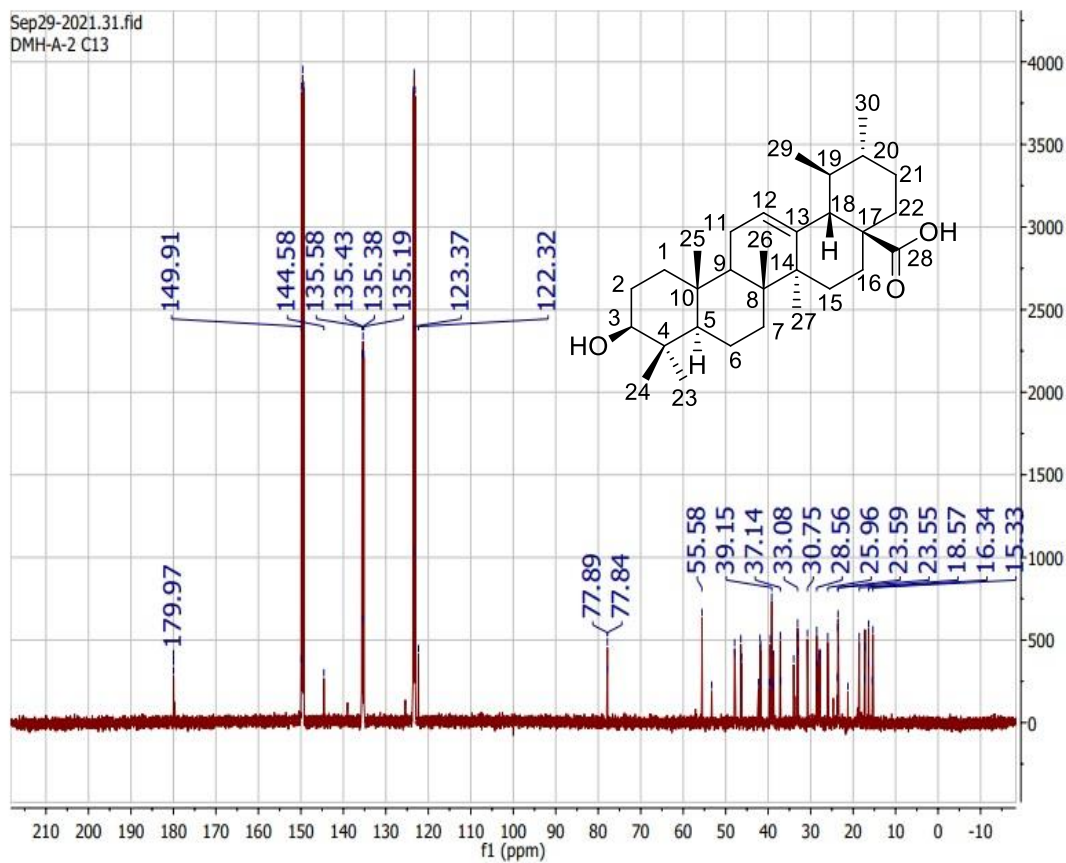

Figure S6:  $^{13}\text{C}$ -NMR spectrum of Compound 3 (125 MHz,  $\text{C}_5\text{D}_5\text{N}$ ).

Dina Mohamed - C.S.L - Hnmr - T

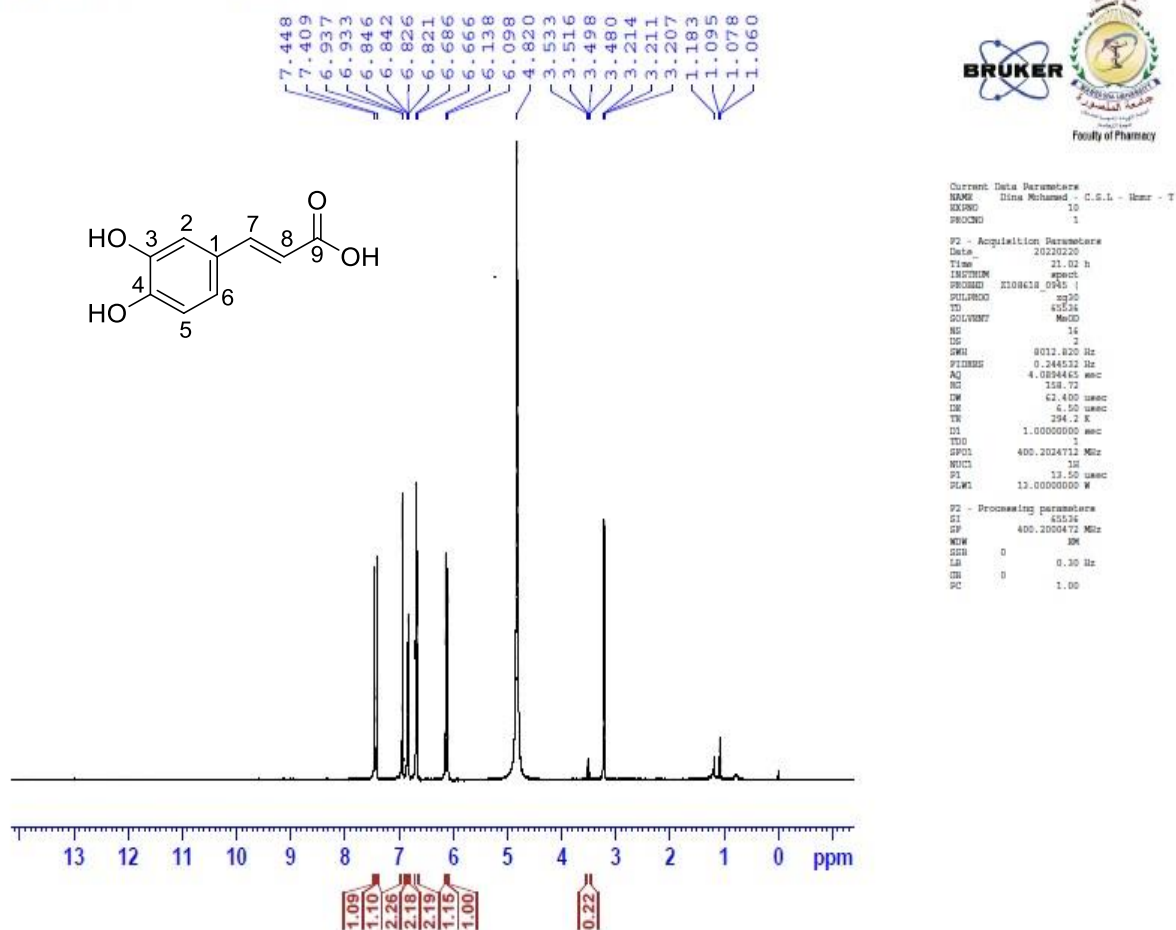

Figure S7: <sup>1</sup>H-NMR spectrum of Compound 4 (500 MHz, MeOH).



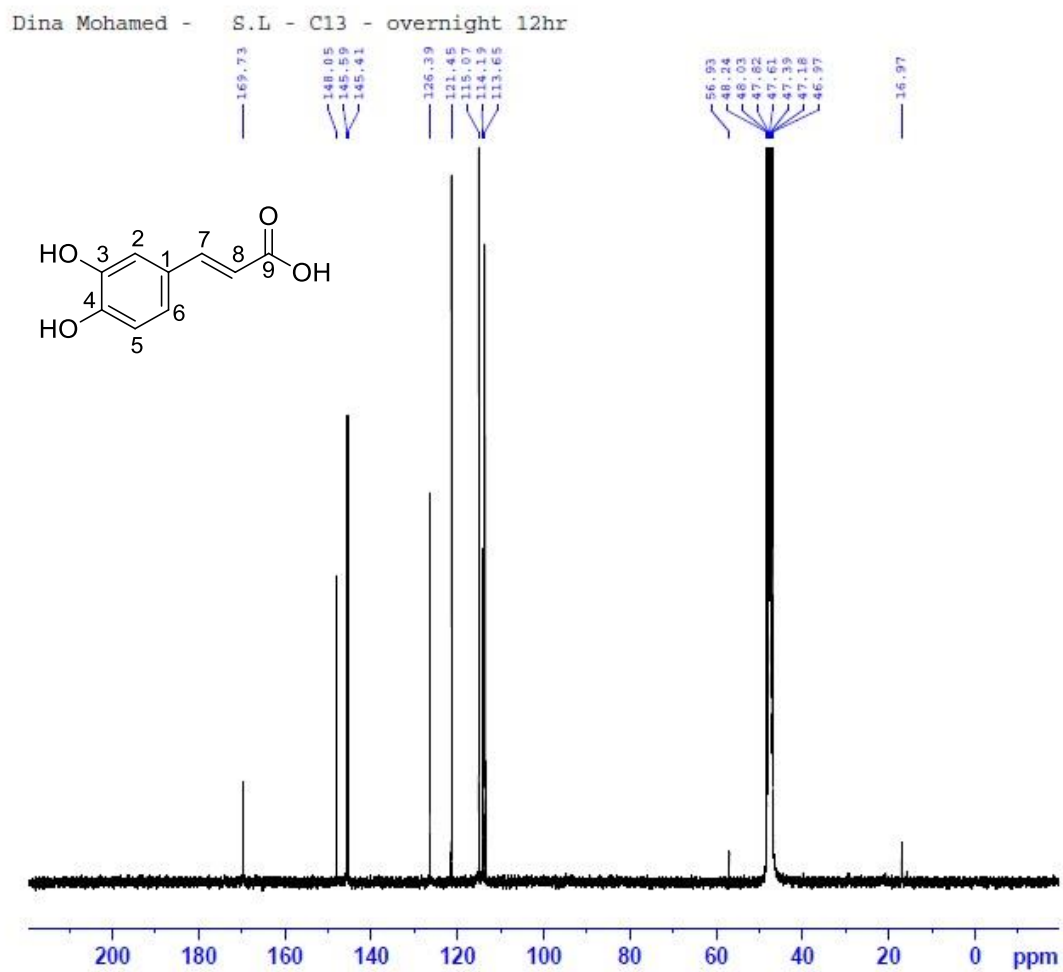

Figure S8:  $^{13}\text{C}$ -NMR spectrum of Compound 4 (125 MHz, MeOH).

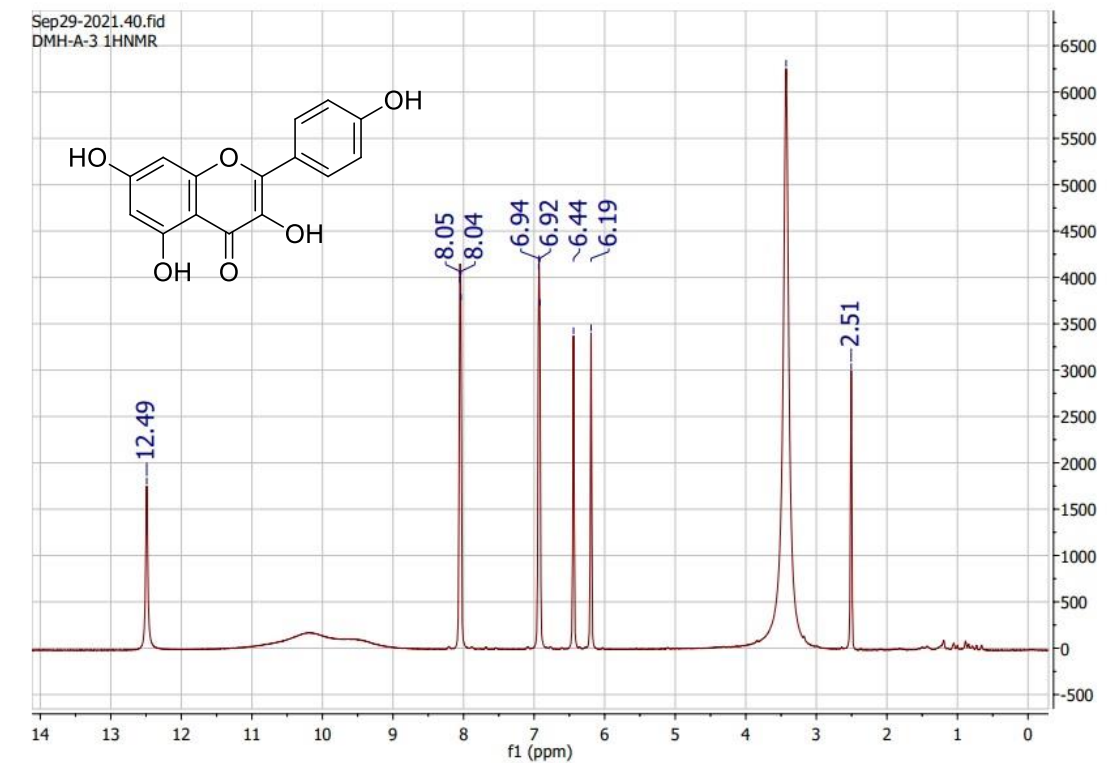

Figure S9:  $^1\text{H}$ -NMR spectrum of Compound 5 (500 MHz, DMSO- $d_6$ ).

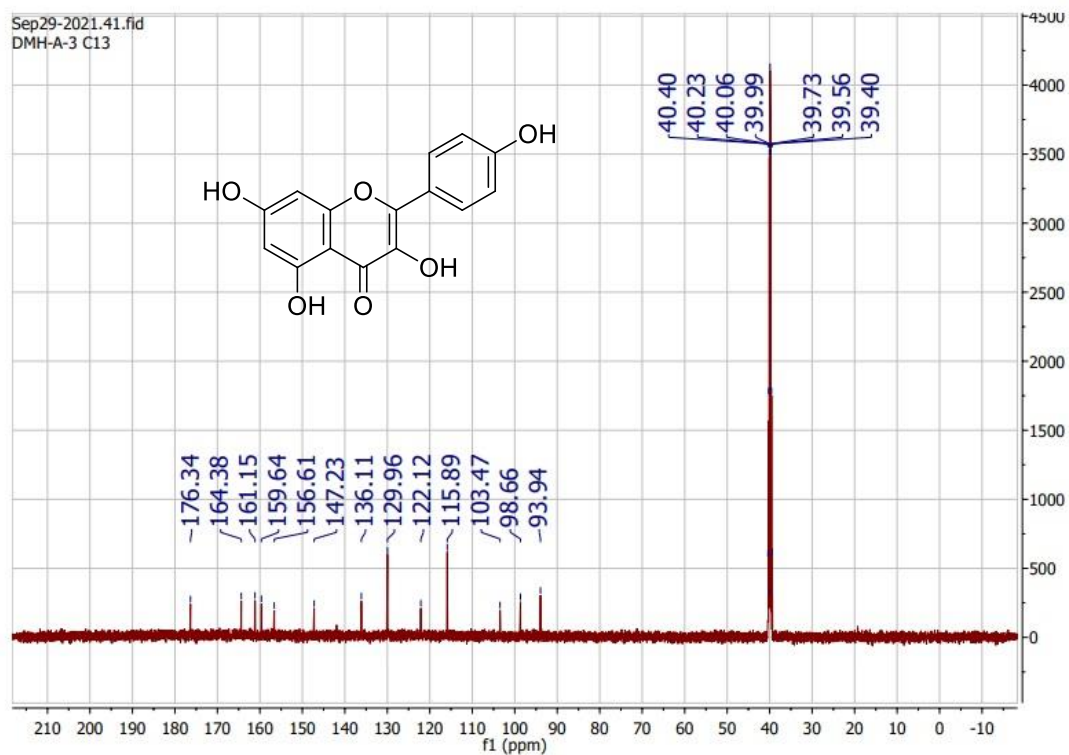

Figure S10:  $^{13}\text{C}$ -NMR spectrum of Compound 5 (125 MHz, DMSO- $d_6$ ).

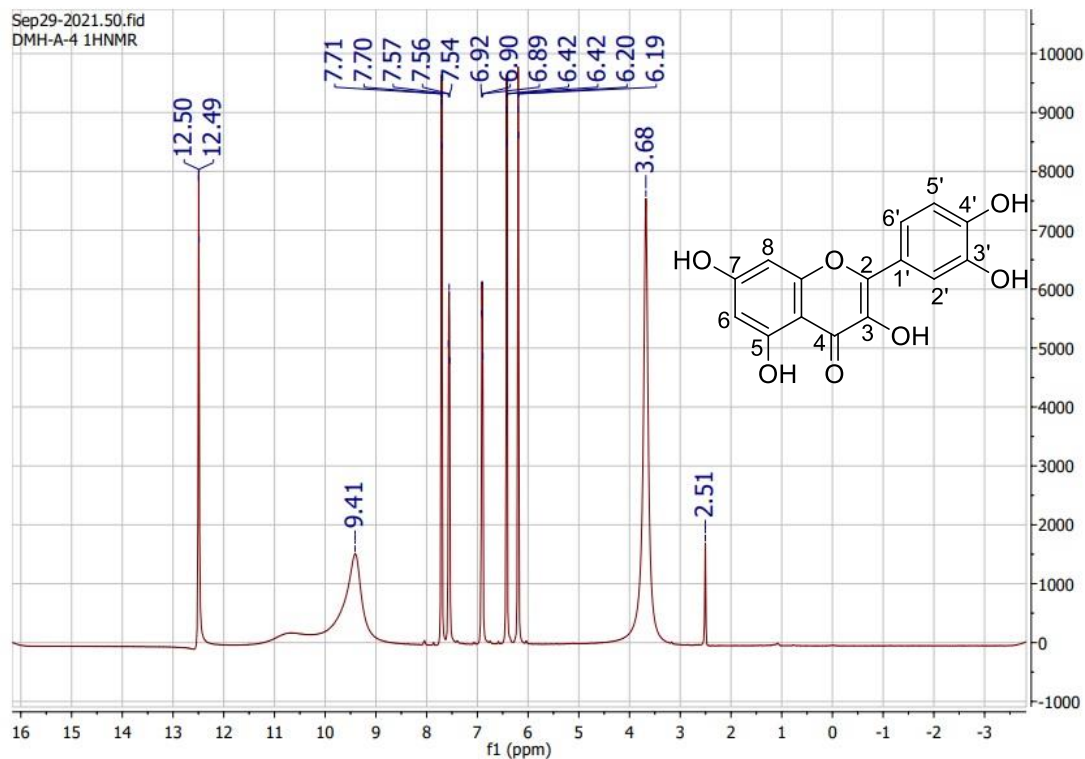

Figure S11:  $^1\text{H}$ -NMR spectrum of Compound 6 (500 MHz, DMSO- $d_6$ ).

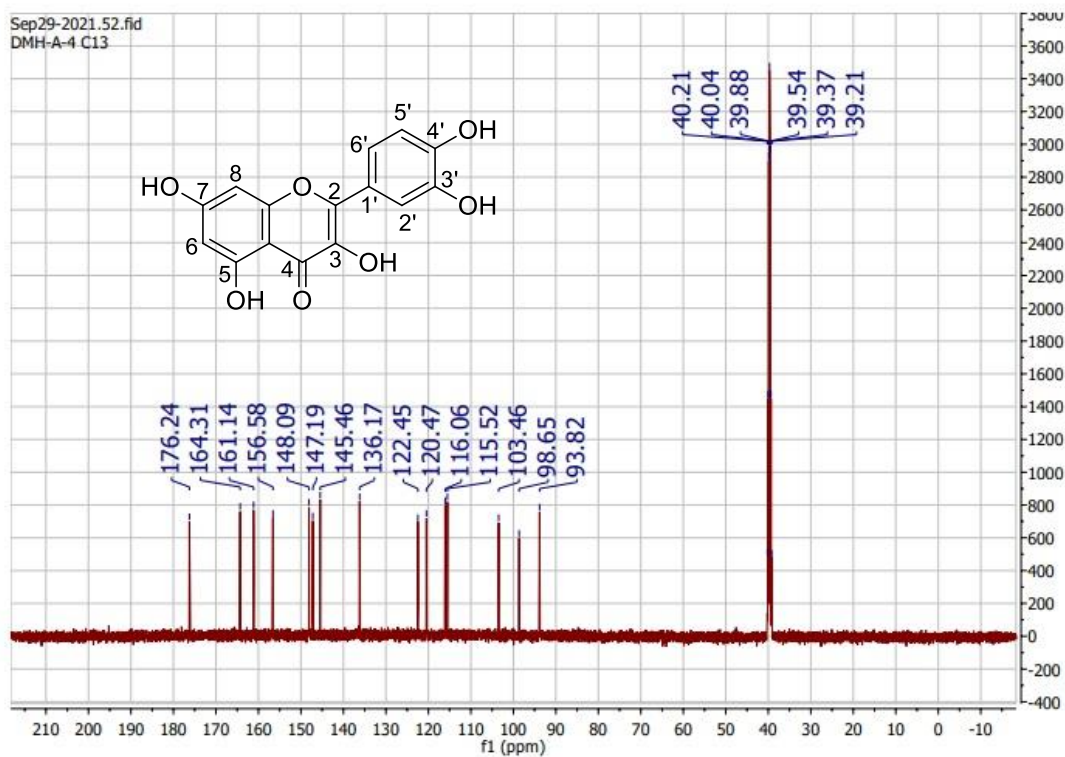

Figure S12:  $^{13}\text{C}$ -NMR spectrum of Compound 6 (125 MHz, DMSO- $d_6$ ).

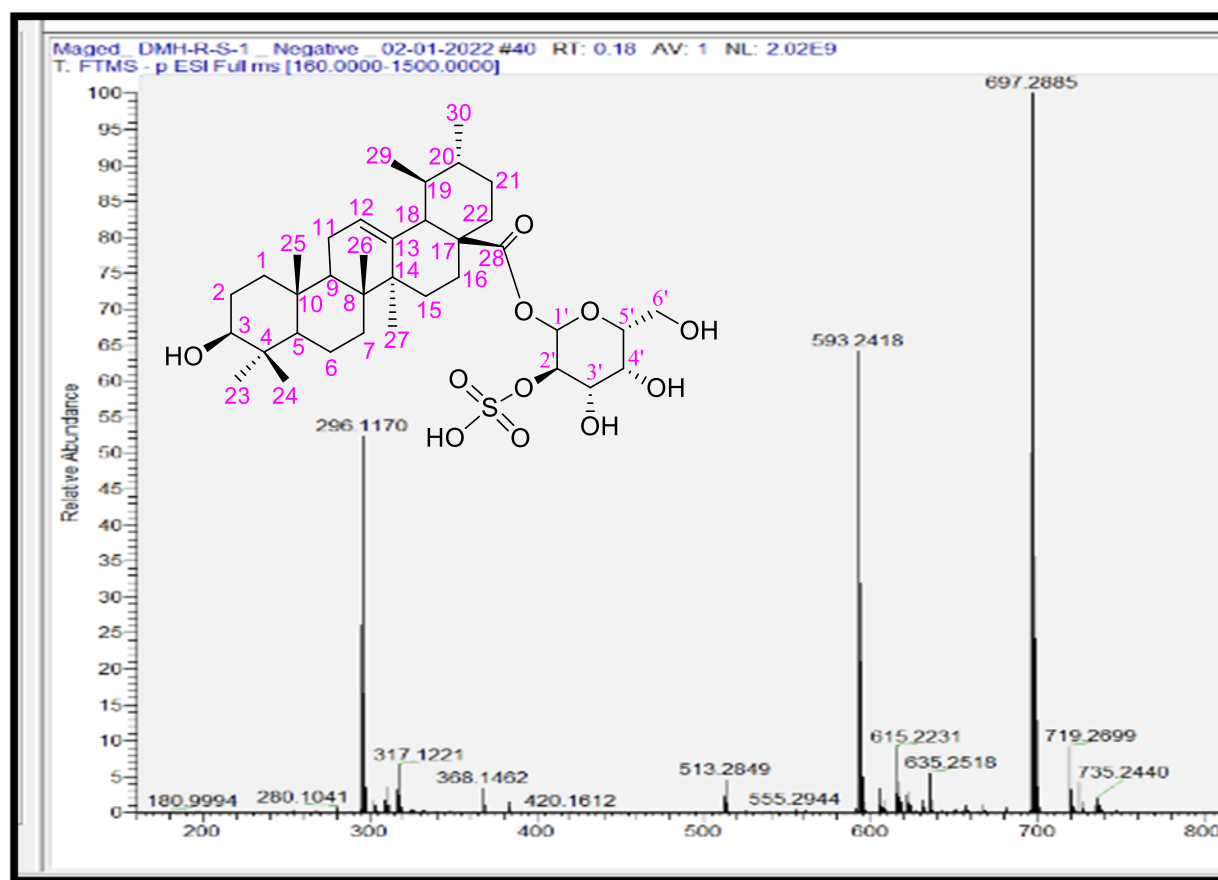

Figure S13: HRMS of Compound 7

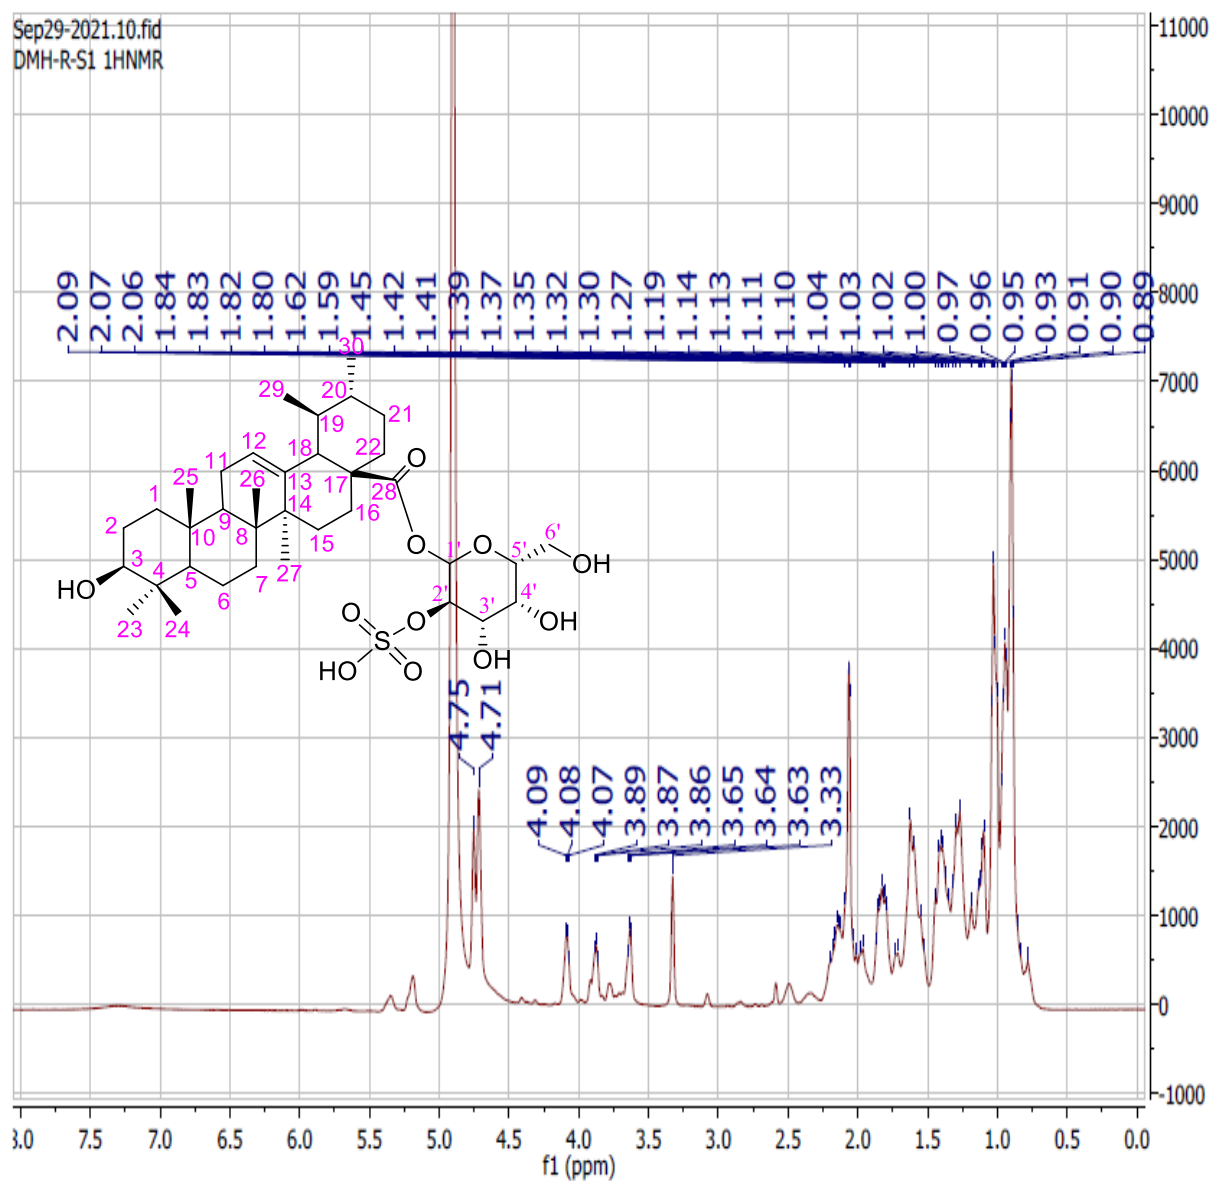

Figure S14:  $^1\text{H}$ -NMR spectrum of Compound 7 (500 MHz, MeOH).

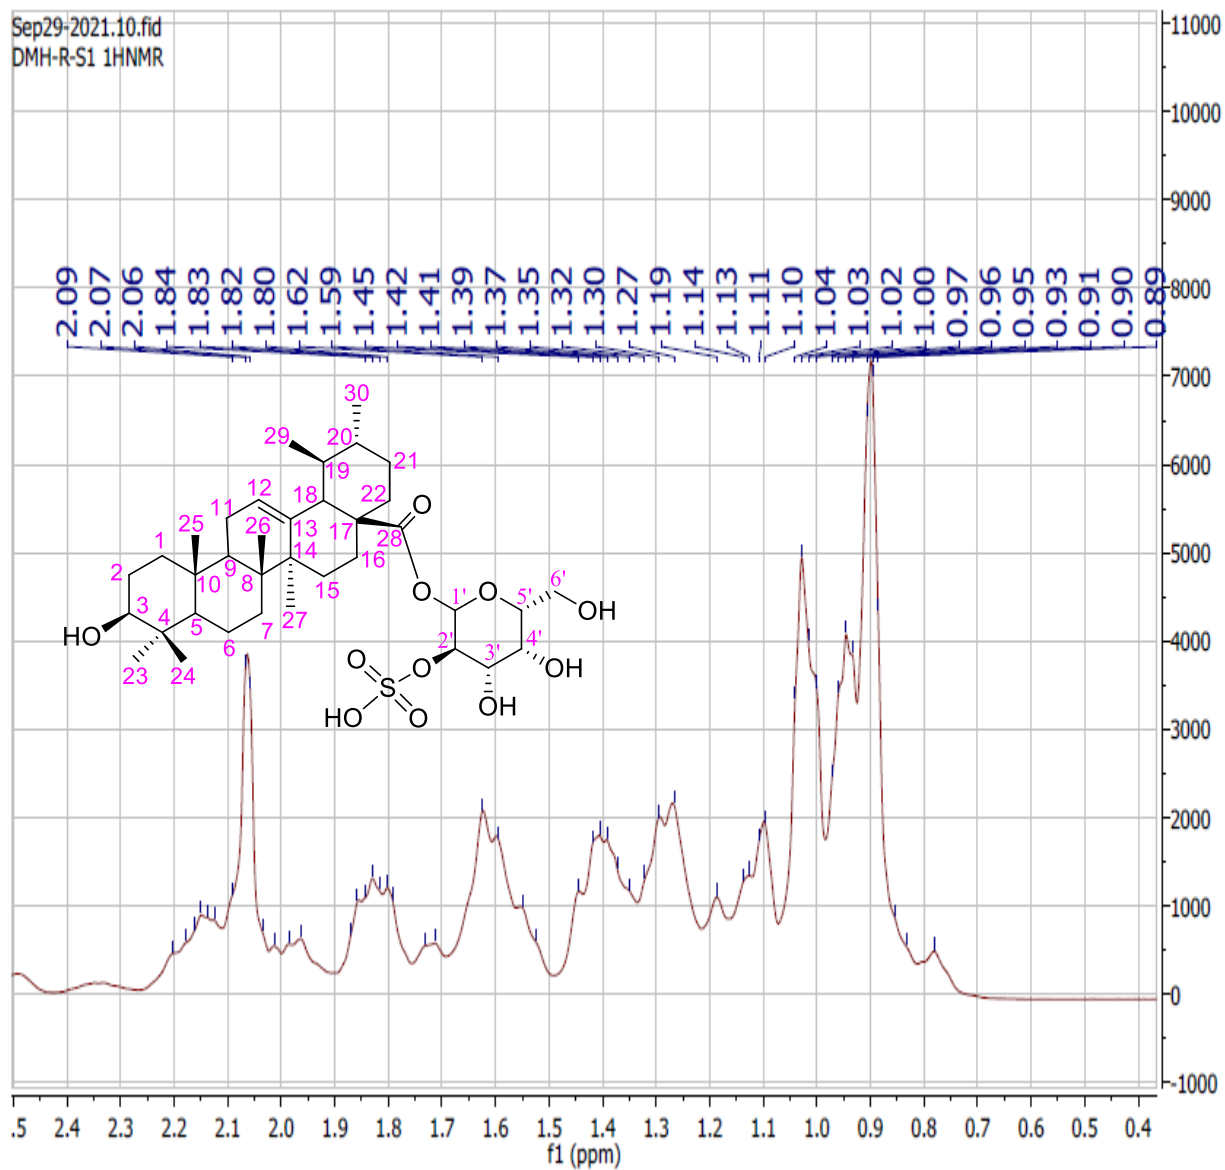

**Figure S15: Partial expansion of  $^1\text{H}$ -NMR spectrum of Compound 7 (500 MHz, MeOH).**

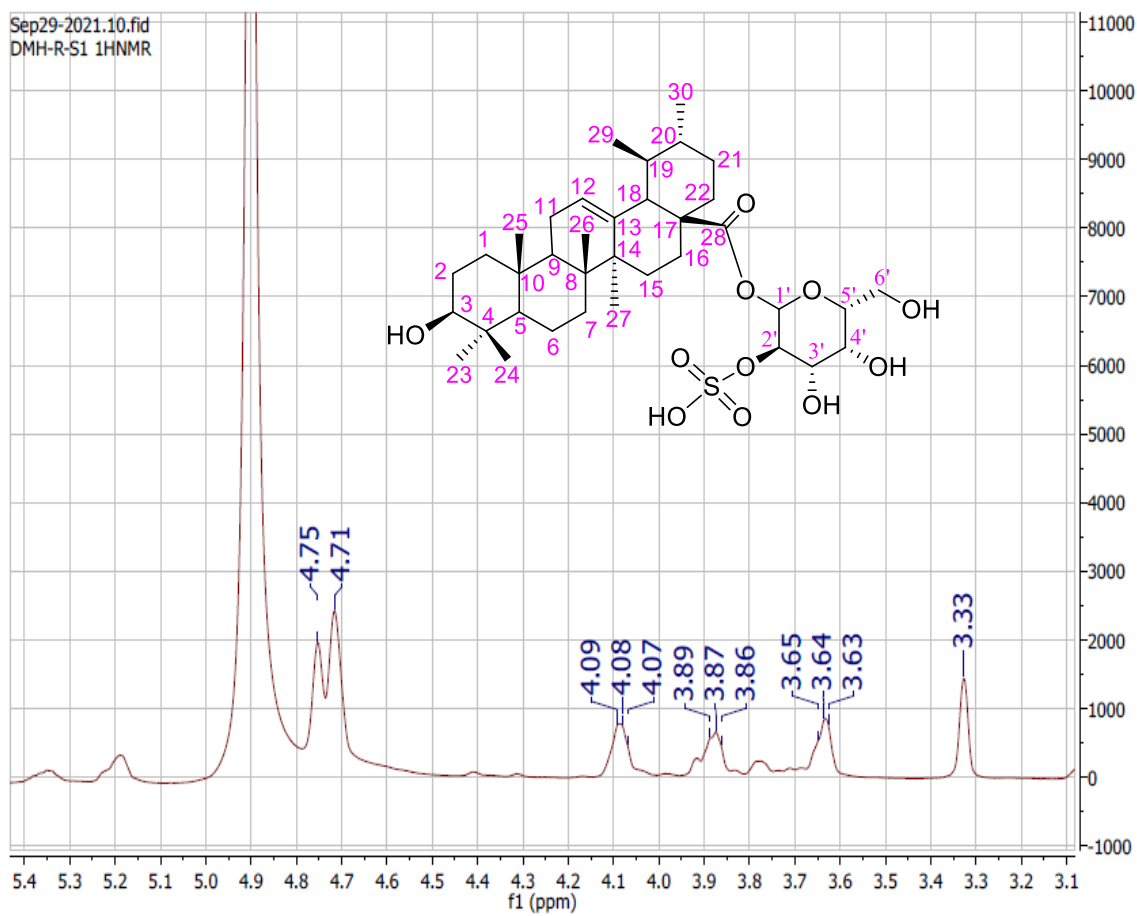

Figure S16: Partial expansion of  $^1\text{H}$ -NMR spectrum of Compound 7 (500 MHz, MeOH).

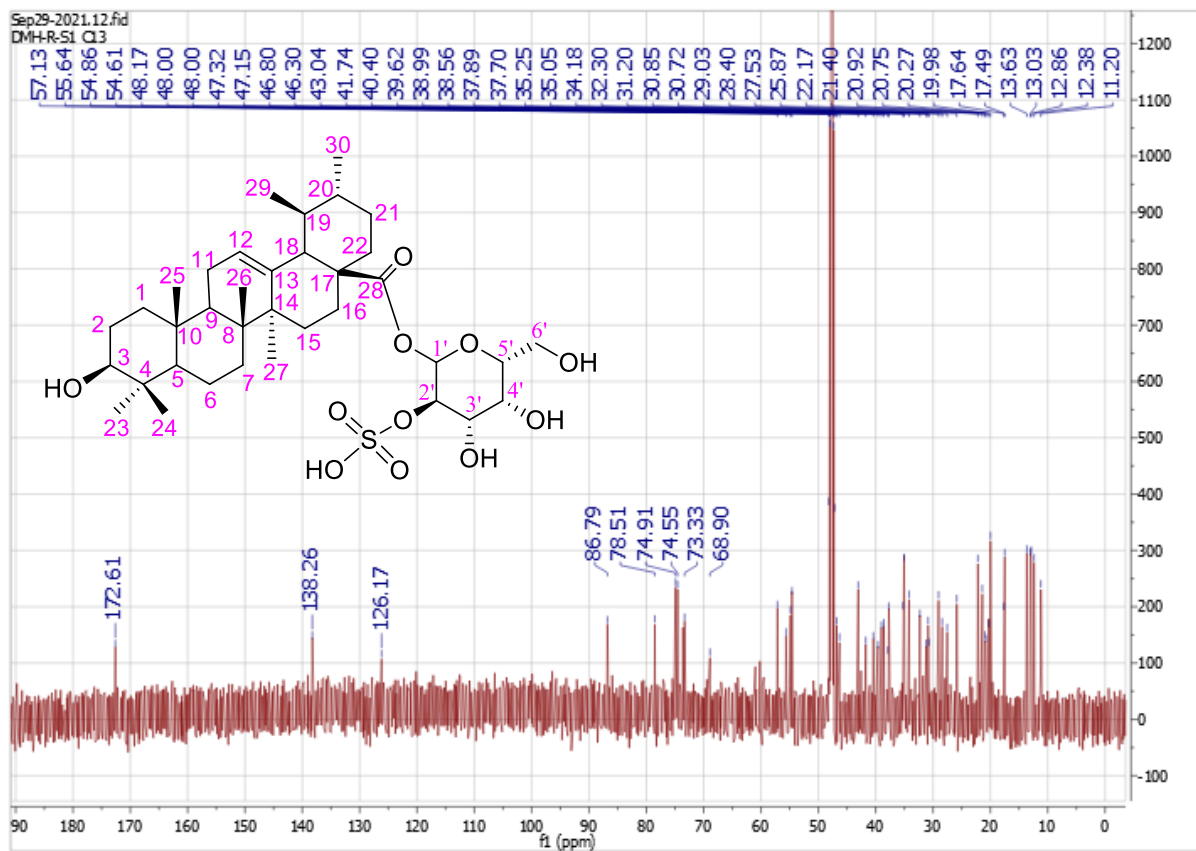

Figure S17:  $^{13}\text{C}$ -NMR spectrum of Compound 7 (125 MHz, MeOH).



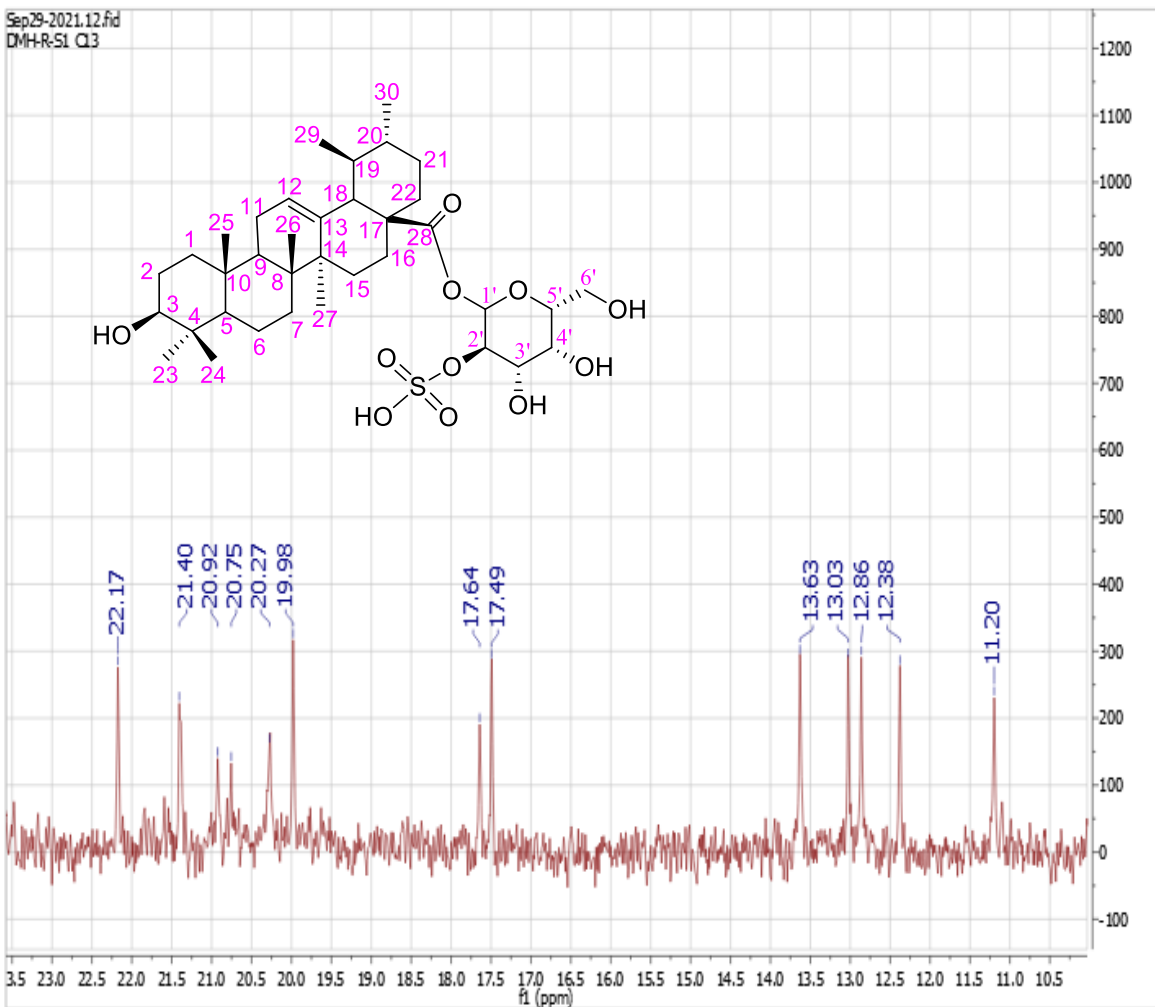

**Figure S18:** Partial expansion of <sup>13</sup>C-NMR spectrum of Compound 7 (125 MHz, MeOH).

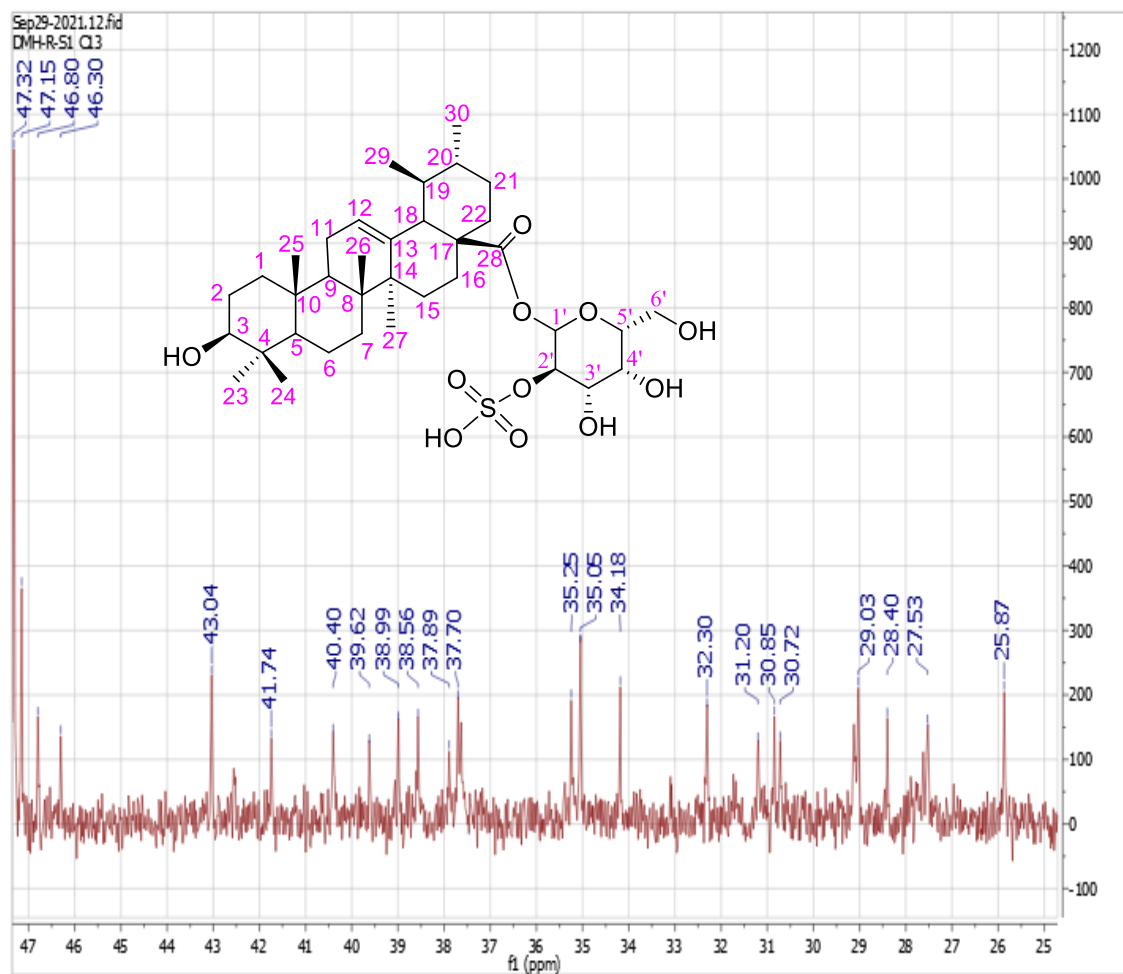

Figure S19: Partial expansion of  $^{13}\text{C}$ -NMR spectrum of Compound 7 (125 MHz, MeOH).

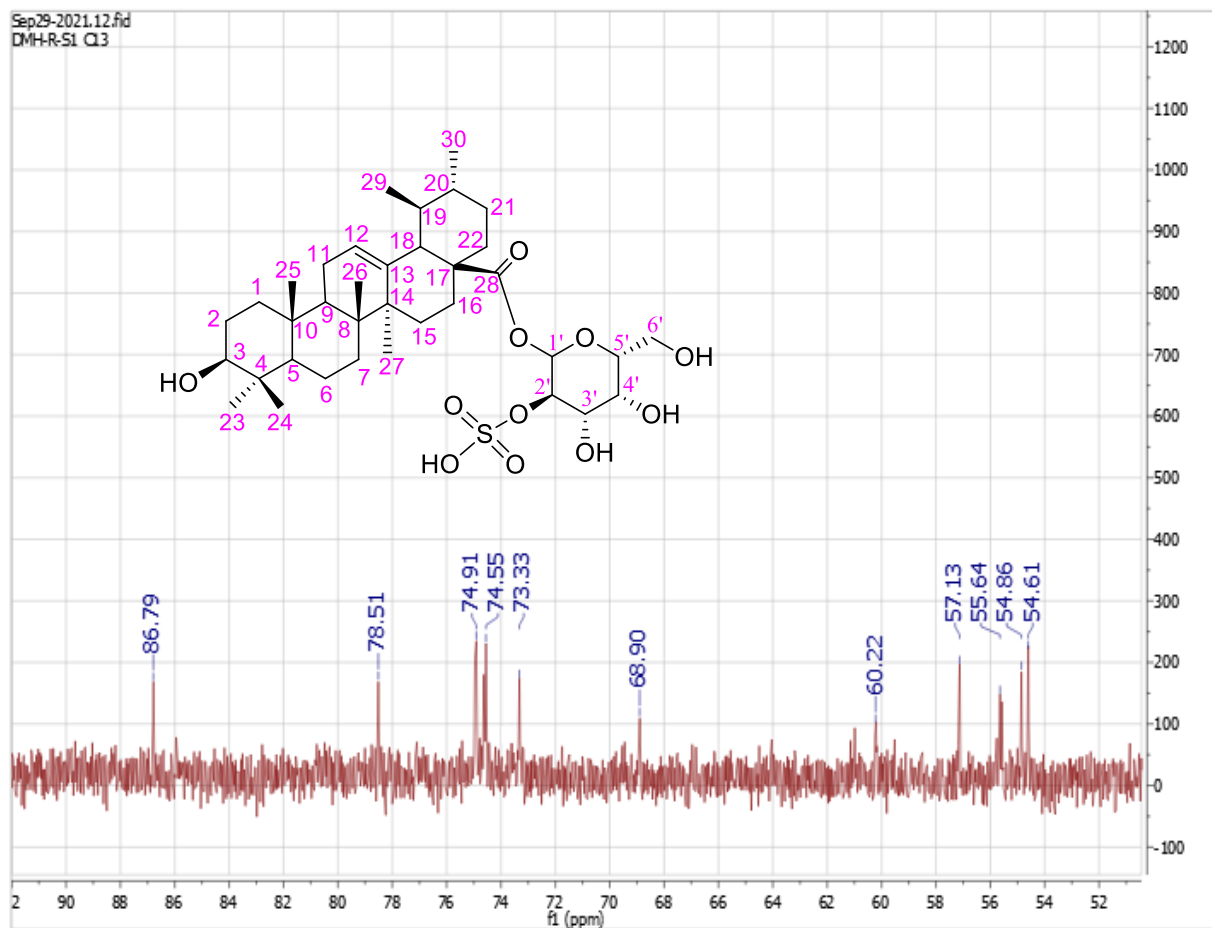

Figure S20: Partial expansion of <sup>13</sup>C-NMR spectrum of Compound 7 (125 MHz, MeOH).

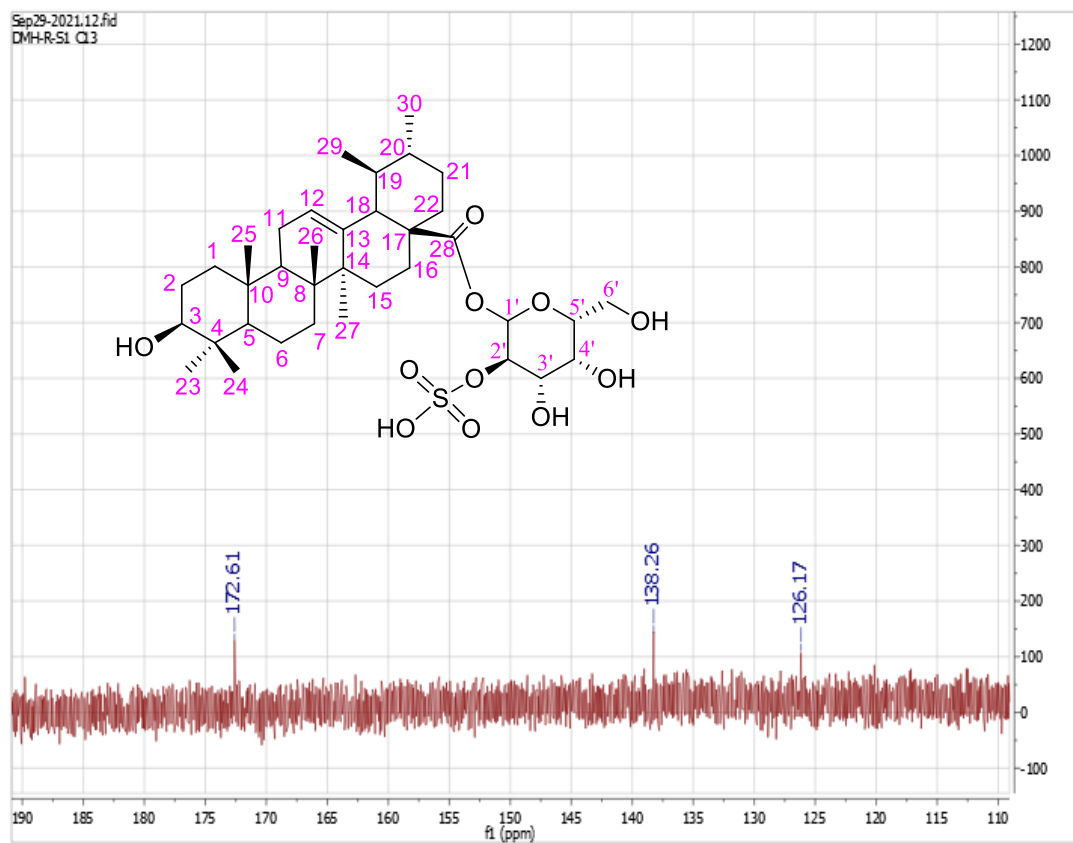

**Figure S21: Partial expansion of <sup>13</sup>C-NMR spectrum of Compound 7 (125 MHz, MeOH).**

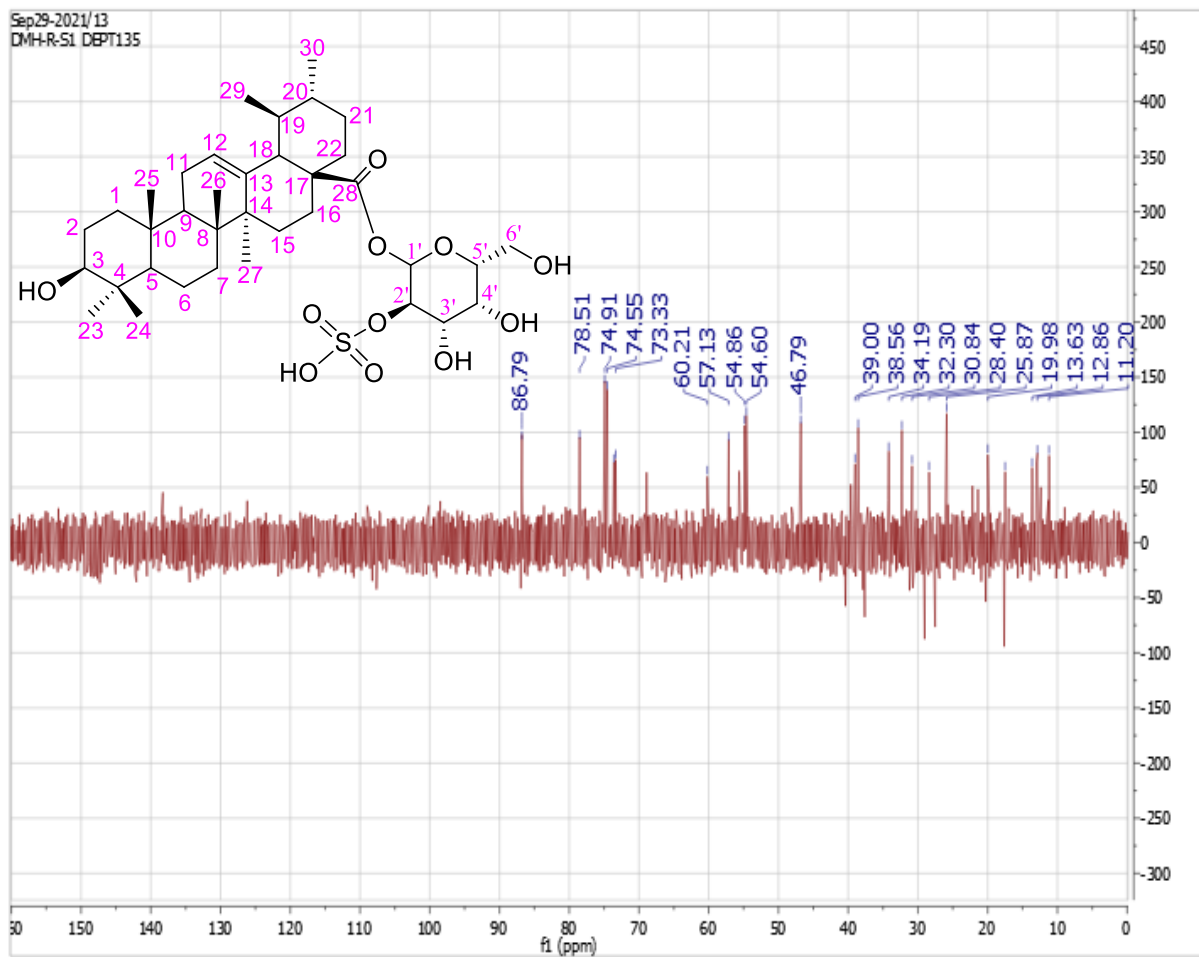

Figure S22: DEPT 135 of Compound 7 (125 MHz, MeOH).

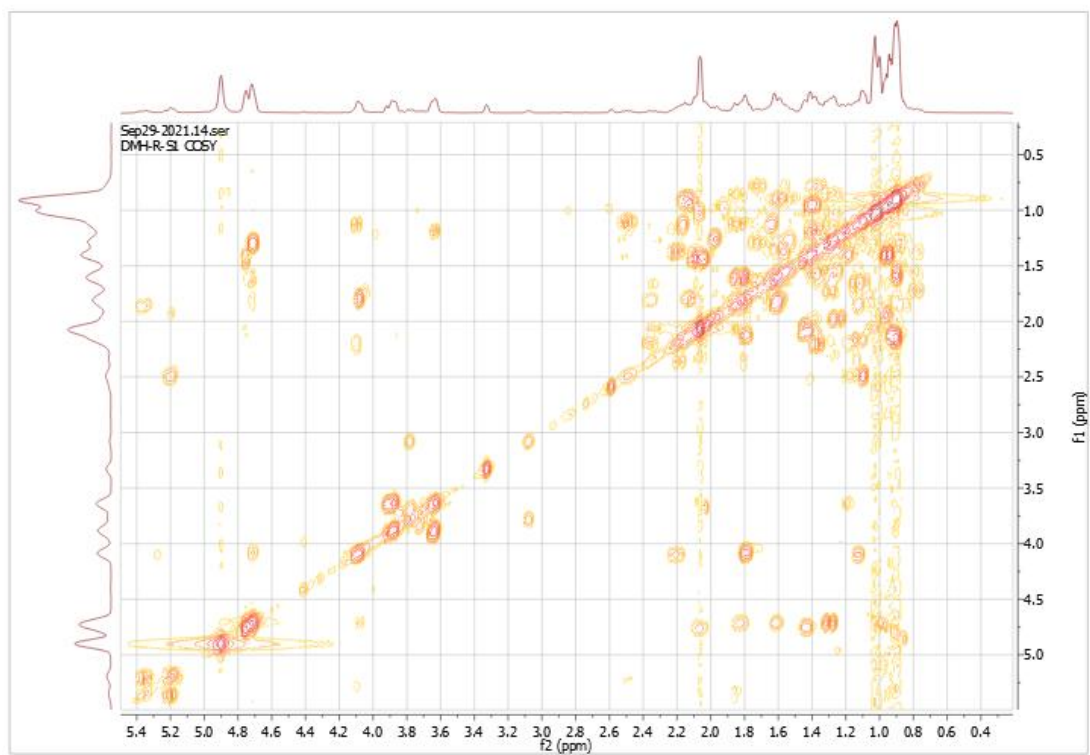

**Figure S23: COSY of Compound 7**

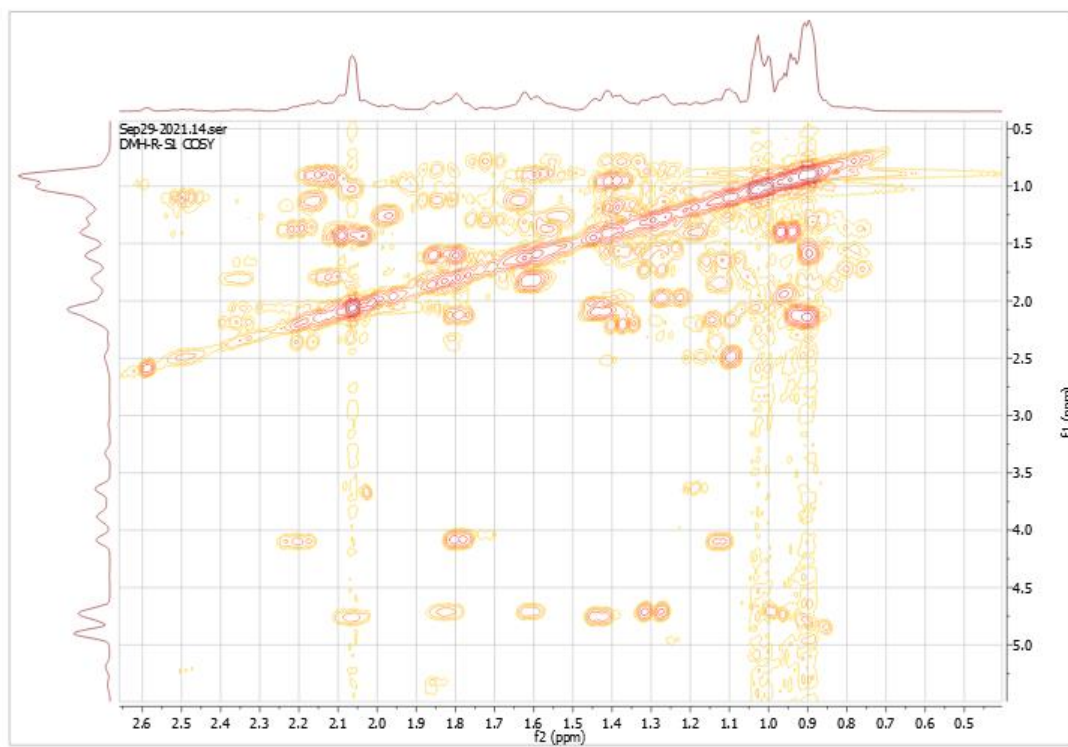

**Figure S24: Partial expansion of COSY of Compound 7.**

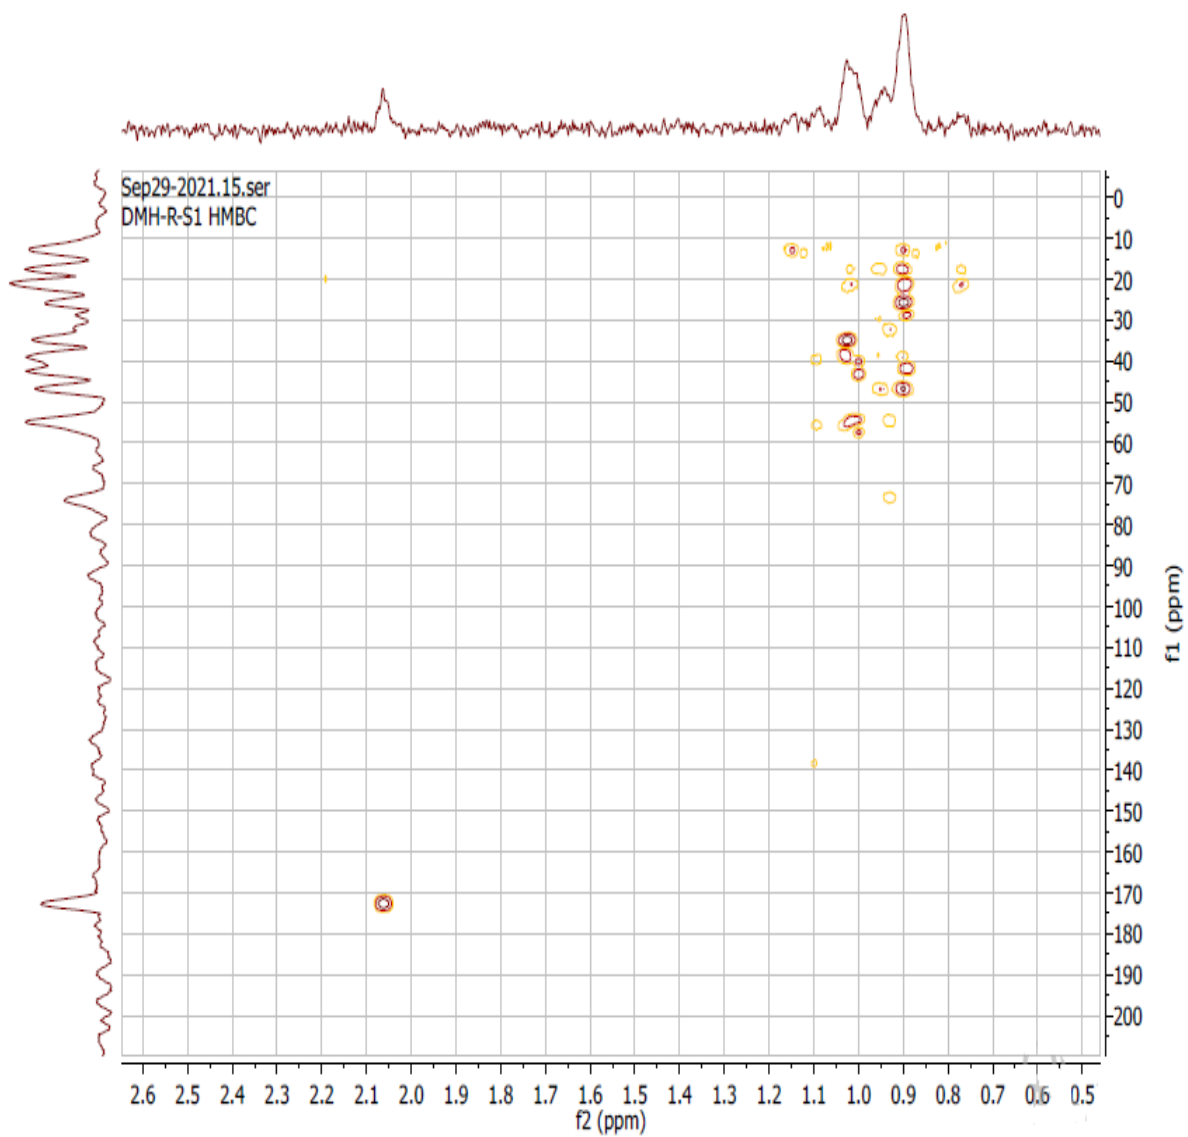

**Figure S25: HMBC of compound 7**

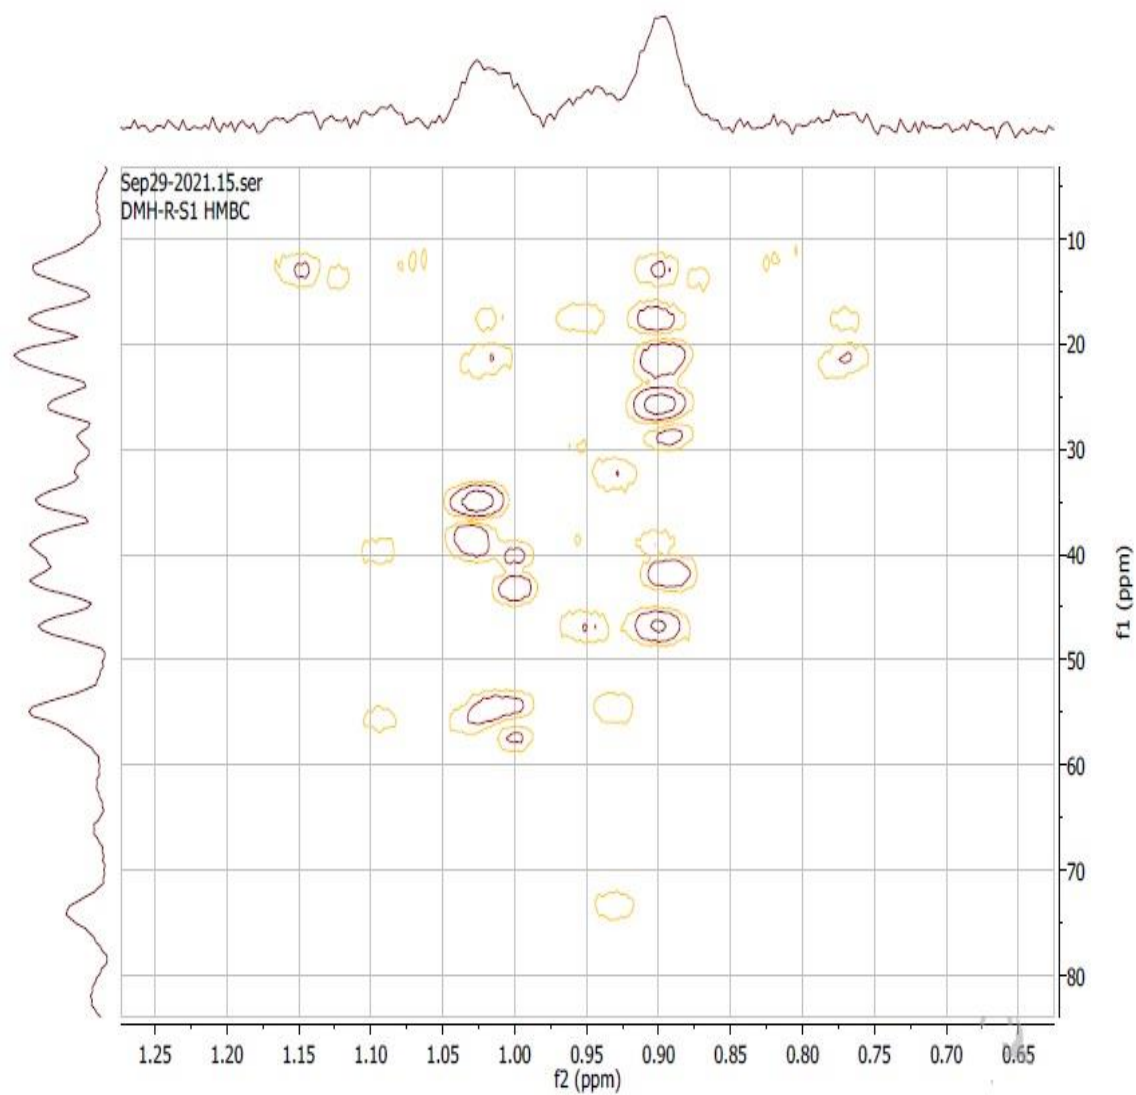

**Figure S26: Expansion of HMBC of compound 7.**



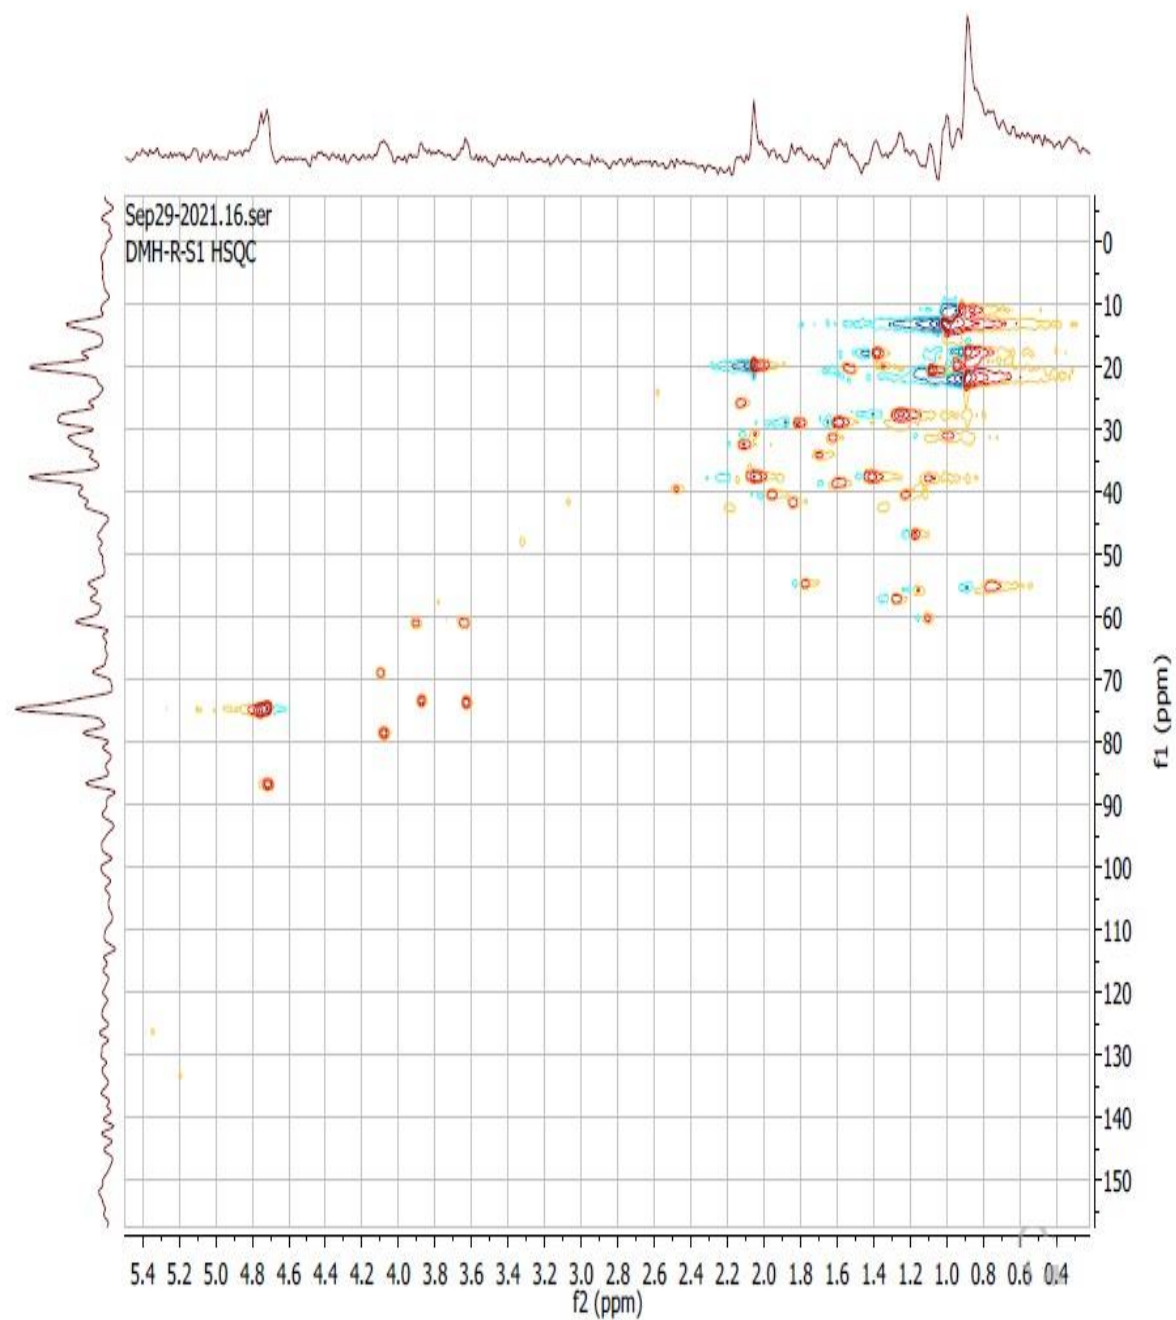

**Figure S27: HSQC of compound 7**

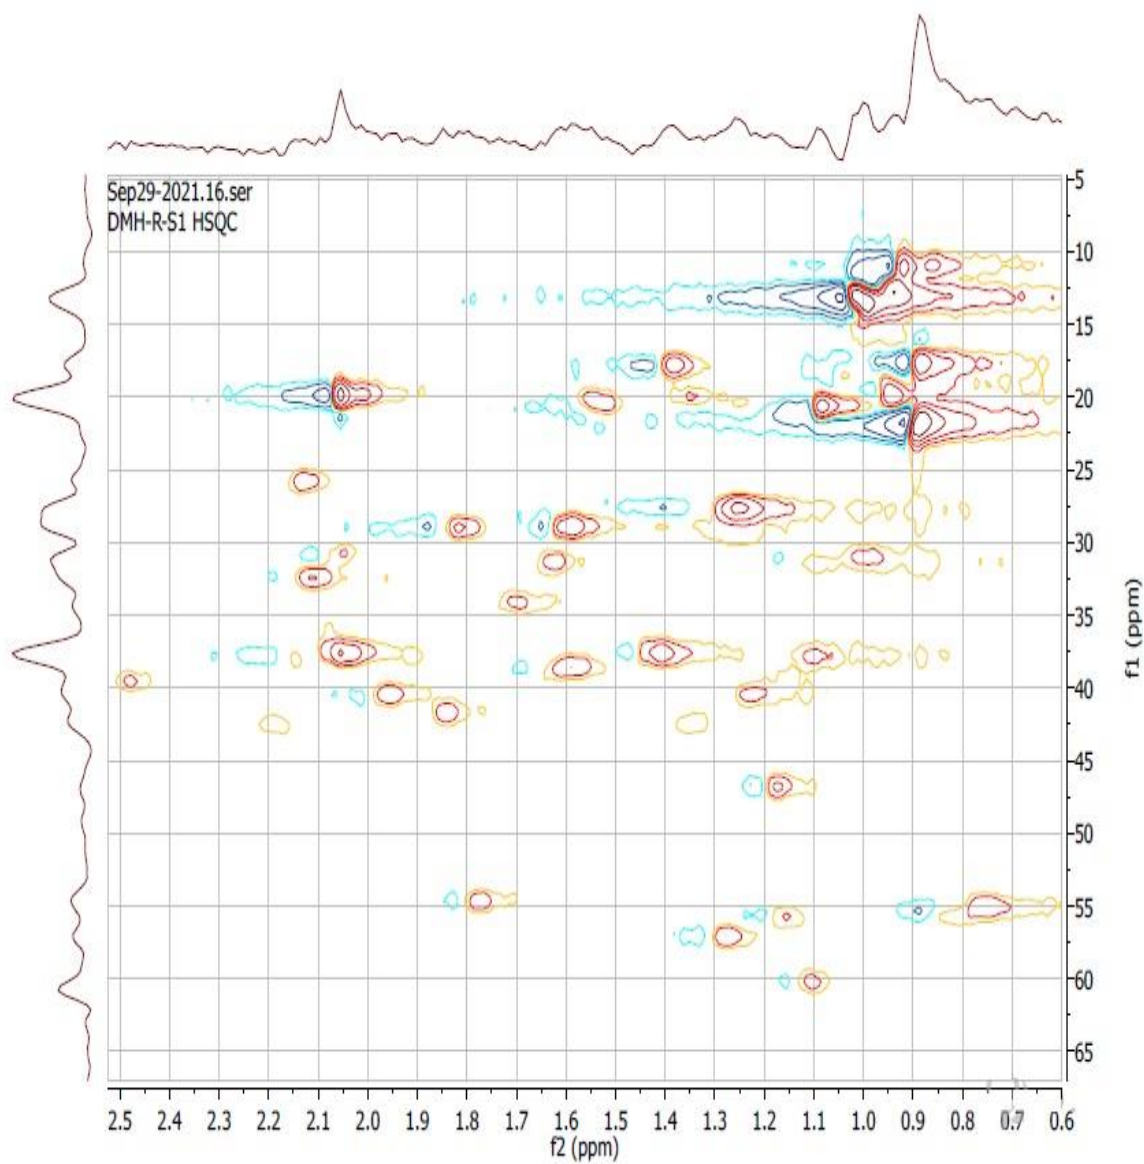

**Figure S28: Expansion of HSQC of compound 7.**

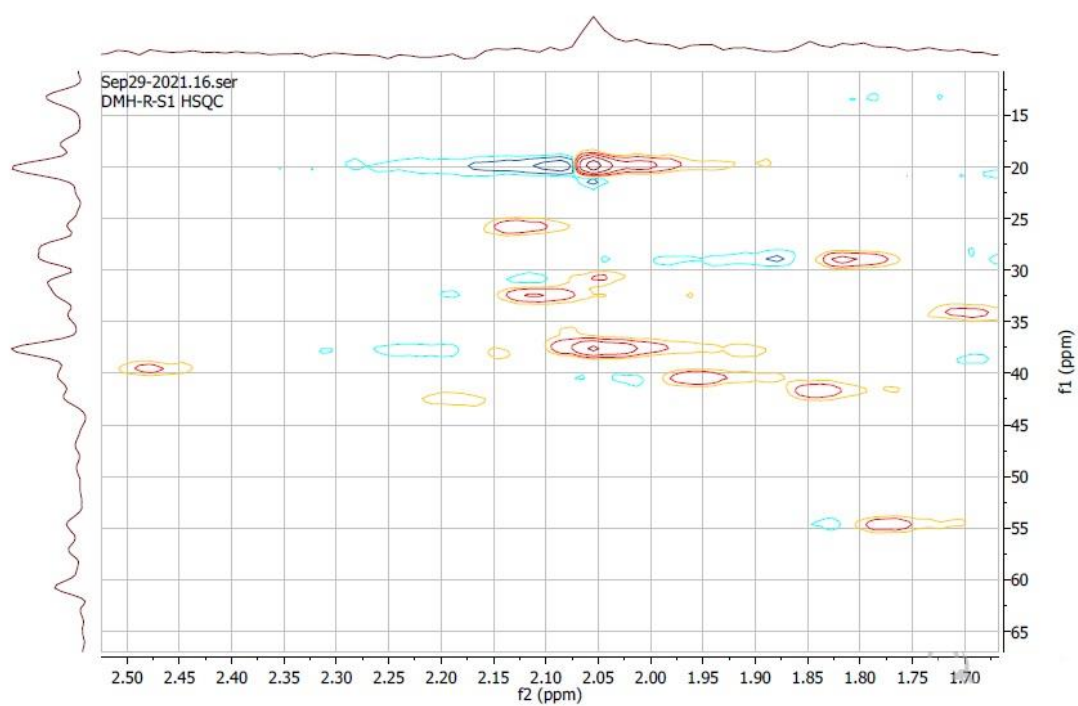

**Figure S29: Expansion of HSQC of compound 7.**

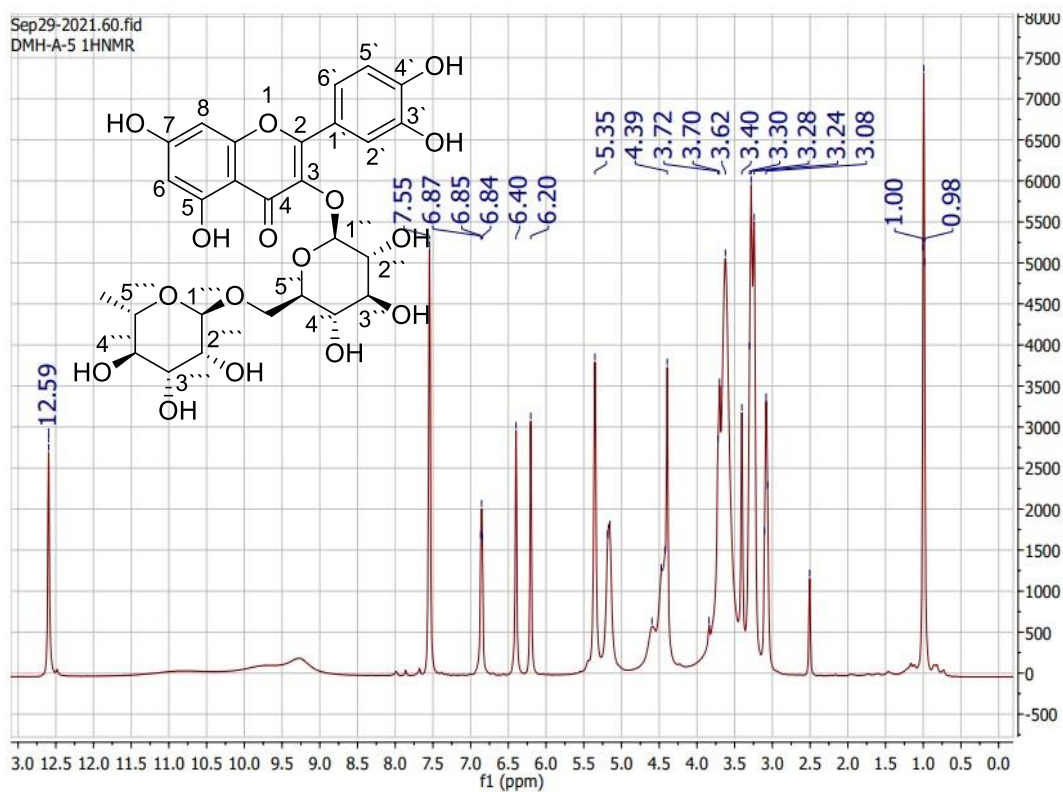

Figure S30:  $^1\text{H}$ -NMR spectrum of Compound 8 (500 MHz,  $\text{DMSO-d}_6$ ).

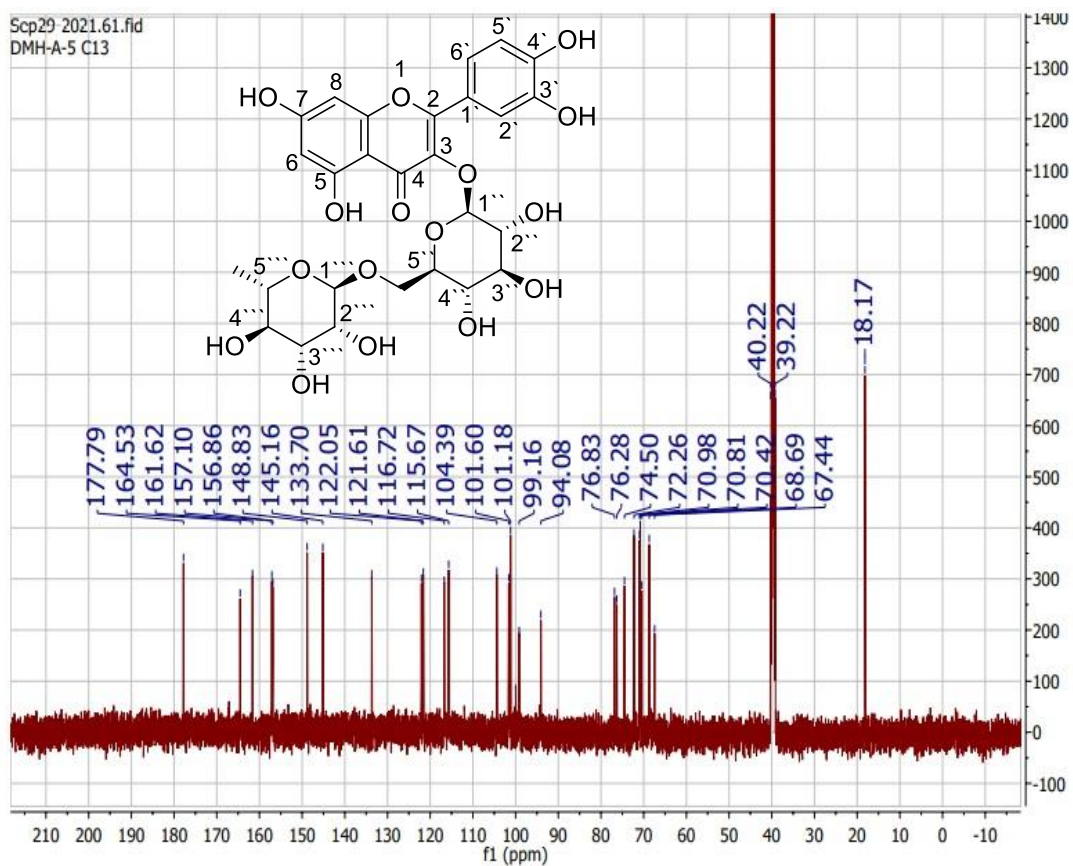

Figure 31:  $^{13}\text{C}$ -NMR spectrum of Compound 8 (125 MHz, DMSO- $\text{d}_6$ ).

**Table S1. Liver enzymes and kidney markers in the groups of the preliminary study**

|                                     | ALT<br>(IU/L) | AST<br>(IU/L) | Urea<br>(mg/dL) | Creatinine (mg/dL) |
|-------------------------------------|---------------|---------------|-----------------|--------------------|
| Normal control                      | 45.60 ± 5.00  | 50.79 ± 5.90  | 19.03 ± 3.23    | 0.92 ± 0.13        |
| <i>Z. album</i> extract (100 mg/kg) | 44.22 ± 4.11  | 50.36 ± 5.21  | 20.29 ± 3.25    | 0.90 ± 0.20        |
| Zygo-albuside A (10 mg/kg)          | 46.32 ± 5.03  | 51.04 ± 4.32  | 20.19 ± 3.29    | 0.91 ± 0.18        |
| Rutin (10 mg/kg)                    | 45.29 ± 5.08  | 49.89 ± 4.90  | 20.21 ± 3.50    | 0.92 ± 0.19        |

Values are expressed as mean ± SD (n = 5). Data were analyzed using ANOVA followed by Tukey's post hoc test.

**Table S2.** Primer sequences and annealing temperatures for genes amplification.

|                | <b>Forward primer</b>           | <b>Reverse primer</b>         | <b>Annealing temperature</b> |
|----------------|---------------------------------|-------------------------------|------------------------------|
| NF- $\kappa$ b | 5'-CAATGGCTACACAGGACCA-3'       | 5'-CACTGTCACCTGGAACCAGA-3'    | 52 °C                        |
| TNF- $\alpha$  | 5'-TCTACTGAACTTCGGGGTGATCG-3'   | 5'-TGATCTGAGTGTGAGGGTCTGGG-3' | 56 °C                        |
| p53            | 5'-ACCGCCGACCTATCCTTACC-3'      | 5'-TCTTCTGTACGGCGGTCTCTC-3'   | 56 °C                        |
| $\beta$ -actin | 5'-ACGGCCAGGTCATCACTATTG-3'     | 5'-CAAGAAGGAAGGCTGGAAAAGA-3'  | 52 °C                        |
| miR-29a        | 5'-GCGCACTGATTCTTTTGGTGTTCAG-3' | 5'-GCGAGCACAGAATTAATACGAC-3'  | 51 °C                        |
| RNU6B          | 5'-CTCGCTTCGGCAGCACATA-3'       | 5'-CGCTTCACGAATTTGCGTG-3'     | 53 °C                        |
